## Climate services for arboviral diseases in the Caribbean

1 **Full title: Co-developing climate services for public health: stakeholder needs and**  
2 **perceptions for the prevention and control of *Aedes*-transmitted diseases in the**  
3 **Caribbean.**

4

5 **Short title: Climate services for arboviral diseases in the Caribbean**

6

7 Anna M. Stewart-Ibarra<sup>1,2,\*</sup>, Moory Romero<sup>1,3</sup>, Avery Q. J. Hinds<sup>4</sup>, Rachel Lowe<sup>5,6,7</sup>,

8 Roché Mahon<sup>8</sup>, Cedric J. Van Meerbeeck<sup>8</sup>, Leslie Rollock<sup>9</sup>, Marquita Gittens-St.

9 Hilaire<sup>10,11</sup>, Sylvester St. Ville<sup>12</sup>, Sadie J. Ryan<sup>13,14</sup>, Adrian R. Trotman<sup>8</sup>, Mercy J.

10 Borbor-Cordova<sup>15</sup>

11

12 1. Institute for Global Health and Translational Science, State University of New  
13 York (SUNY) Upstate Medical University, Syracuse, NY, USA

14 2. Department of Medicine and Department of Public Health and Preventative  
15 Medicine, SUNY Upstate Medical University, Syracuse, NY, USA

16 3. Department of Environmental Studies, SUNY College of Environmental Sciences  
17 and Forestry, Syracuse, NY, USA

18 4. Caribbean Public Health Agency, 16-18 Jamaica Boulevard, Federation Park,  
19 Trinidad & Tobago

20 5. Department of Infectious Disease Epidemiology, London School of Hygiene &  
21 Tropical Medicine, London, UK

22 6. Centre for the Mathematical Modelling of Infectious Diseases, London School of  
23 Hygiene & Tropical Medicine, London, UK

## Climate services for arboviral diseases in the Caribbean

- 24 7. Barcelona Institute for Global Health (ISGlobal), Barcelona, Spain
- 25 8. The Caribbean Institute for Meteorology and Hydrology, St. James, Barbados
- 26 9. Ministry of Health and Wellness, St. Michael, Barbados
- 27 10. Faculty of Medical Sciences, University of the West Indies at Cave Hill,
- 28 Bridgetown, St. Michael, Barbados
- 29 11. Best-dos Santos Public Health Laboratory, Ministry of Health, St. Michael,
- 30 Barbados
- 31 12. Environmental Health Division, Ministry of Health and Environment, Roseau,
- 32 Commonwealth of Dominica
- 33 13. Quantitative Disease Ecology and Conservation Lab Group, Department of
- 34 Geography and Emerging Pathogens Institute, University of Florida, Gainesville,
- 35 Florida, USA
- 36 14. School of Life Sciences, University of KwaZulu-Natal, Durban, South Africa
- 37 15. Facultad de Ingeniería Marítima y Ciencias del Mar, Escuela Superior Politécnica
- 38 del Litoral (ESPOL), Guayaquil, Ecuador

39

40 \*Corresponding author: State University of New York (SUNY) Upstate Medical  
41 University, 505 Irving Ave., Syracuse, NY 13210 USA; Email: [stewart@upstate.edu](mailto:stewart@upstate.edu);  
42 Phone: +1 315 464 6489

## Climate services for arboviral diseases in the Caribbean

### 43 **Abstract**

44 **Background:** Small island developing states (SIDS) in the Caribbean region are  
45 challenged with managing the health outcomes of a changing climate. Health and climate  
46 sectors have partnered to co-develop climate services to improve the management of  
47 these diseases, for example, through the development of climate-driven early warning  
48 systems. The objective of this study was to identify health and climate stakeholder  
49 perceptions and needs in the Caribbean, with respect to the development of climate  
50 services for arboviruses (e.g. dengue, chikungunya, and Zika).

51 **Methods:** Stakeholders included public decision makers and practitioners from the  
52 climate and health sectors at the regional (Caribbean) level and from the countries of  
53 Dominica and Barbados. From April to June 2017, we conducted interviews (n=41),  
54 surveys (n=32), and national workshops with stakeholders. Survey responses were  
55 tabulated and audio recordings were transcribed and analyzed using qualitative coding to  
56 identify responses by research topic, country/region, and sector.

57 **Results:** Health practitioners indicated that their jurisdiction is currently experiencing an  
58 increased risk of diseases transmitted by *Ae. aegypti* due to climate variability, and most  
59 anticipated that this risk will increase in the future. National health sectors reported  
60 financial limitations and a lack of technical expertise in geographic information systems  
61 (GIS), statistics, and modeling, which constrained their ability to implement climate  
62 services for arboviruses. National climate sectors were constrained by a lack of  
63 personnel. Stakeholders highlighted the need to strengthen partnerships with the private  
64 sector, academia, and civil society. They identified a gap in local research on climate-  
65 arbovirus linkages, which constrained the ability of the health sector to make informed

## Climate services for arboviral diseases in the Caribbean

66 decisions. Strategies to strengthen the climate-health partnership included a top-down  
67 approach by engaging senior leadership, multi-lateral collaboration agreements, national  
68 committees on climate and health, and shared spaces of dialogue. Mechanisms for  
69 mainstreaming climate services for health operations to control arboviruses included  
70 climate-health bulletins and an online GIS platform that would allow for regional data  
71 sharing and the generation of spatiotemporal epidemic forecasts.

72 **Conclusions:** These findings support the creation of interdisciplinary and intersectoral  
73 communities of practices and the co-design of climate services for the Caribbean public  
74 health sector. By fostering the effective use of climate information within health policy,  
75 research and practice, nations will have greater capacity to adapt to a changing climate.

76

77 **Keywords:** climate services, dengue fever, arbovirus, *Aedes aegypti*, public health,  
78 Caribbean, small island developing states (SIDS), early warning system, co-development,  
79 climate change, adaptation

80

## Climate services for arboviral diseases in the Caribbean

### 81 **Introduction**

82 Small island developing states (SIDS) in the Caribbean region are highly  
83 susceptible to the health impacts of climate variability and long-term changes in climate  
84 [1,2]. Impacts include increased risk of communicable diseases, such as mosquito-borne  
85 arboviruses, and noncommunicable diseases, such as cardiovascular complications  
86 associated with heat stress. SIDS face similar challenges—small populations who are  
87 repeatedly exposure to extreme climate events (e.g., droughts and tropical storms),  
88 limited global political power, reliance on imported goods, and difficulty preventing and  
89 responding to disasters due to resource constraints [1,3,4]. Caribbean SIDS will likely  
90 experience more extreme climate events in the future due to climate change, increasing  
91 the social and economic burden of climate-sensitive health outcomes.

92 Dengue fever, chikungunya and Zika fever, arboviral diseases transmitted by the  
93 *Aedes aegypti* mosquito, are among the top public health concerns in the Caribbean  
94 region [5,6]. The Caribbean Public Health Agency (CARPHA) recently issued an  
95 advisory for the possibility of a severe dengue epidemic in 2019 [7], given a rise in  
96 dengue activity in Latin America, the increasing burden of arboviruses over the last  
97 number of years, and the large gap in time since the last dengue epidemic in the  
98 Caribbean region, which occurred in 2009. The Caribbean is the region of the Americas  
99 with the highest incidence of dengue [8]. Vector control is the main public health  
100 interventions to prevent and control disease outbreaks through insecticide application,  
101 elimination of larval habitat sites, public education and community mobilization [9].  
102 Despite these efforts, the annual number of dengue cases in the region increased from an  
103 estimated 136,000 to 811,000 cases between 1990 and 2013, with case estimates adjusted

## Climate services for arboviral diseases in the Caribbean

104 to account for underreporting [8]. Novel tools and management strategies are urgently  
105 needed to increase the capacity of the public health sector to prevent and respond to  
106 arboviral disease outbreaks.

107 Changes in local climate can influence *Ae. aegypti* physiology and population  
108 dynamics, thereby affecting disease transmission. Warmer ambient temperatures increase  
109 the probability of arbovirus transmission by *Ae. aegypti*, with optimum transmission at  
110 28.5°C; however, transmission is improbable in extreme heat (>34°C) [10]. Both excess  
111 rainfall and drought conditions can potentially increase mosquito densities, depending on  
112 the characteristics of the build environment and anthropogenic water storage [11,12]. In  
113 the Caribbean region, studies have documented the effects of climate on dengue and *Ae.*  
114 *aegypti* in Barbados [11,13–16], Cuba [17], Puerto Rico [18–20], Jamaica [16,21],  
115 Trinidad and Tobago [13,16], and Guadeloupe [22].

116 Given the linkages between arboviruses, *Ae. aegypti*, and climate, the World  
117 Health Organization and experts in the Caribbean have recommended developing  
118 climate-driven early warning systems (EWS) and models to forecast arbovirus outbreaks  
119 [23,24]. These tools are known as climate services -- tailored products for a specific  
120 sector that allow decision makers and practitioners to plan interventions. For example, an  
121 EWS for arboviruses could inform decisions about when and where to deploy public  
122 health interventions to prevent an epidemic in the context of an impending climate event  
123 [25]. A recent study by Lowe et al. [11] found that dengue transmission in Barbados  
124 increased one month after a particularly wet month and five months after a drought event  
125 was observed, and the model was able to accurately predict outbreak versus non-outbreak

## Climate services for arboviral diseases in the Caribbean

126 months. This study demonstrated the potential to develop an operational climate-driven  
127 forecast model to predict arbovirus outbreaks in the eastern Caribbean.

128         The perceptions, needs, and interests of stakeholders from the health and climate  
129 sectors should ideally drive the development and implementation of a forecast model  
130 through an iterative engagement process with modelers and other scientists [26,27]. The  
131 end-users of climate information are a diverse group of actors with distinct needs and  
132 interests[28,29]. Morss et al. [28] report insightful lessons learned as scientists who  
133 attempt to communicate flood risk to the public sector. They state, “Decision makers are  
134 not a coherent entity, but a collection of individuals, each of whom uses different  
135 information to address different goals in a unique context.” An arbovirus forecast should  
136 be developed with a realistic understanding of the present-day public health response  
137 capacity, which may be constrained by resources, information, prior experiences, and  
138 other actors or institutions [30]. To guide this process, the Global Framework for Climate  
139 Services (GFCS) was developed as the policy mechanism to support the development of  
140 climate services for the health sector and other key sectors [31]. The GFCS aims for  
141 stakeholder engagement between health and climate actors at all levels to promote the  
142 effective use of climate information within health research, policy and practice [31].

143         Prior studies of health sector perceptions of climate have focused on the  
144 perceptions of the health sector with respect to the impacts of long-term climate change  
145 and climate variability. However, few studies (primarily for malaria early warning  
146 systems, MEWS, e.g. [32–34]) address health sector needs and interests with respect to  
147 climate-driven epidemic forecasts. Studies from the United States and Canada have  
148 analyzed the perceptions and engagement of public health practitioners in the context of

## Climate services for arboviral diseases in the Caribbean

149 long-term climate change and impacts on overall health [35–39]. One study from China  
150 assessed health sector perceptions of dengue and climate change [40]. In the Caribbean, a  
151 study found that health providers perceived mosquito-borne disease as increasing due to  
152 changing seasonal patterns [41], whereas another study found that health practitioners  
153 had limited understanding of the effects of climate variability on health [42]. Climate  
154 practitioners in Jamaica were generally aware of the health implications of climate  
155 change for heat stress, respiratory diseases, and vector borne diseases [43].

156 The objective of this study was to identify health and climate stakeholder  
157 perceptions and needs in the Caribbean, with respect to the development of climate  
158 services for arboviruses. We addressed four key areas, based on the GFCS health  
159 exemplar goals [31]:

- 160 (1) What are the perceptions of climate-health or climate-arbovirus linkages?
- 161 (2) Who are the key actors engaged in climate-arbovirus surveillance and control, and  
162 how can communication and partnerships amongst these actors be strengthened?
- 163 (3) What are the current capabilities of the health and climate sectors to implement a  
164 climate-driven arbovirus EWS, and what capacities need to be strengthened so that the  
165 health sector can effectively access, understand and use climate/weather information for  
166 decision-making?
- 167 (4) What climate/weather data are currently used by the health sector for arbovirus  
168 control, what added value does it provide, and how can climate/weather data be  
169 effectively tailored for arbovirus control operations?

170

171



## Climate services for arboviral diseases in the Caribbean

### 172 **Methods**

#### 173 **Ethical statement**

174           The study protocols were reviewed and approved (or deemed exempt) by the  
175 Institutional Review Board (IRB) of the State University of New York Upstate Medical  
176 University, the IRB of the University of the West Indies, Cave Hill Campus on behalf of  
177 the Ministry of Health of Barbados, and the Ministry of Health and Environment of  
178 Dominica. No informed consent was required, as all participants were adults (>18 years  
179 of age), were public sector employees, and no identifying information was gathered.

180

#### 181 **Study sites**

182           This study focused on the perspectives of health and climate stakeholders from  
183 the countries of Barbados and Dominica (Figure 1), SIDS in the eastern Caribbean, as  
184 well as regional Caribbean stakeholders. There is a high burden of arboviral diseases in  
185 both countries [44–48] (Table 1). These countries were selected because of the regional  
186 and national interest in building on previous projects, wherein the health sector identified  
187 climate services as a top priority for the management of arboviruses.

## Climate services for arboviral diseases in the Caribbean

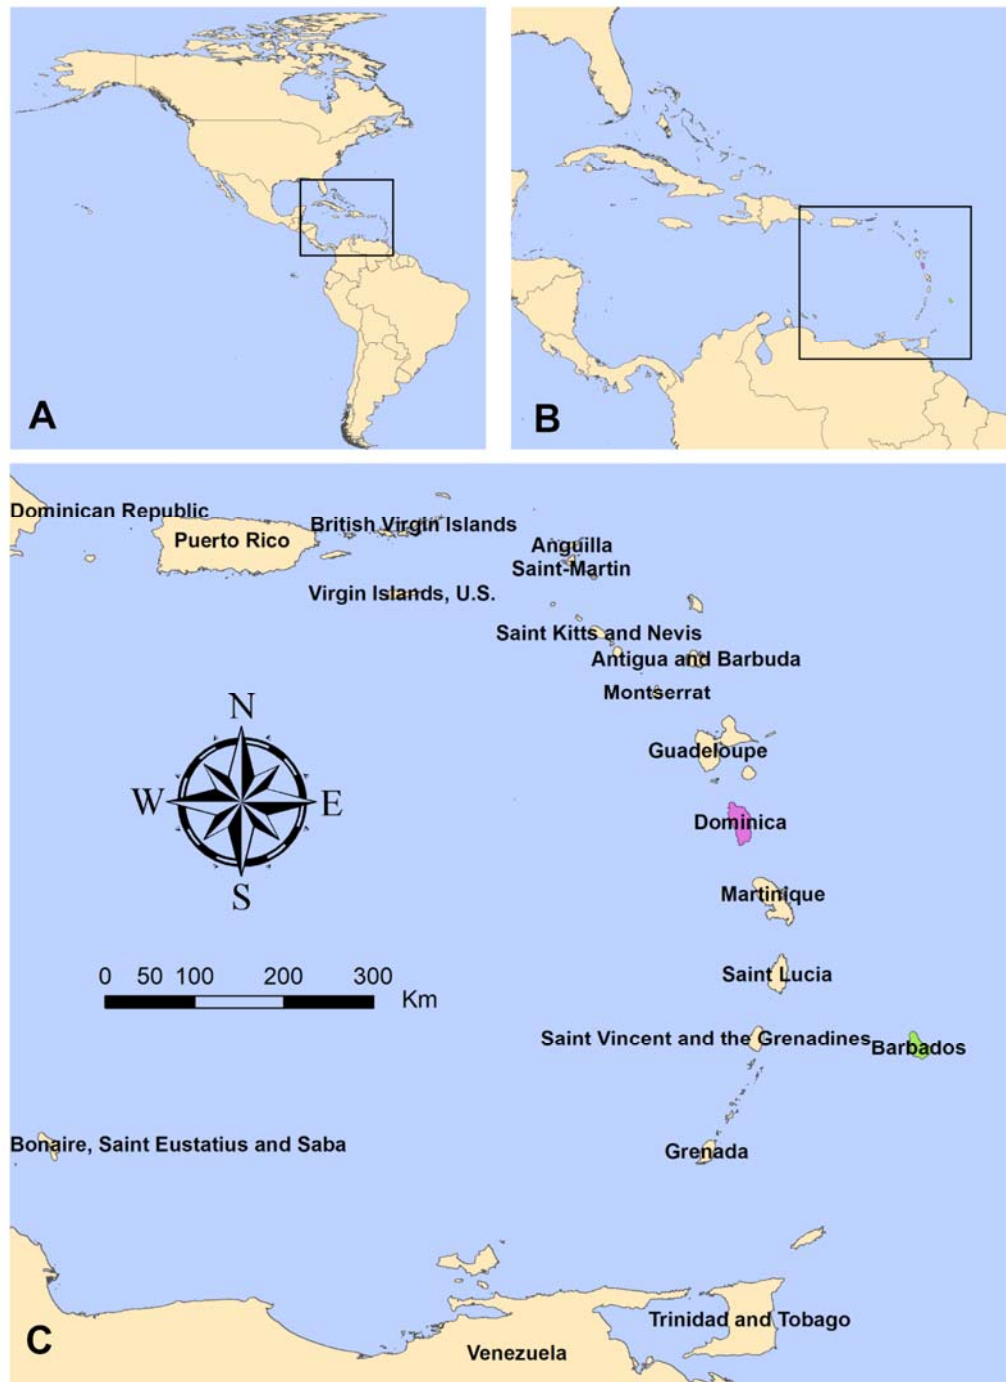

188

189 **Figure 1: Map of the study region**, showing A. The location of the Caribbean region  
190 within the Americas, with inset B. showing the archipelago of islands making up the  
191 Caribbean, and their location within Meso-America, with inset C. the location of  
192 Dominica (purple) and Barbados (green) within the islands in the region. This map was  
193 created using freely available country boundary data from GADM.org, rendered in  
194 ArcGIS, and image files created using GIMP freeware.

## Climate services for arboviral diseases in the Caribbean

**Table 1. Arboviral disease cases in Barbados and Dominica**

|                                                                  | Barbados                         | Dominica                         |
|------------------------------------------------------------------|----------------------------------|----------------------------------|
| Mean annual dengue cases (2012-2016) [82]*                       | 2,274                            | 169                              |
| Mean annual dengue incidence (2012-2016) per 10,000 people [82]* | 80.0                             | 23.5                             |
| Total chikungunya cases since 2013 [83]                          | 1,833 suspected<br>114 confirmed | 3,590 suspected<br>173 confirmed |
| Total Zika cases since 2016 [46,47]                              | 705 suspected<br>150 confirmed   | 1,263 suspected<br>79 confirmed  |

195 \*Includes suspected and confirmed cases

196 Barbados (pop. 284,996; land area: 439 km<sup>2</sup>) has a service-based economy, with  
 197 tourism accounting for 12% of the gross domestic produce (GDP). However, tourism is a  
 198 water-intensive sector, and droughts threaten to reduce the already limited freshwater  
 199 resources [49]. From 2011-2015, Barbados was selected as the country in the Western  
 200 hemisphere for the WHO project on climate change adaptations strategies for human  
 201 health, funded by the Global Environment Facility (GEF) Special Climate Change Fund  
 202 (SCCF) [50]. The Ministry of Health is responsible for arbovirus and vector surveillance  
 203 and control.

204 Dominica (pop. 73,543; land area: 750 km<sup>2</sup>) is characterized by abundant  
 205 freshwater resources, forest and rugged terrain. Eco-tourism is becoming increasingly  
 206 significant to its economy. Dominica was selected as the health exemplar for the GFCS,  
 207 resulting in a national consultation on climate and health vulnerability in 2015-2016 that  
 208 included vector borne diseases (VBDs), food safety, and water borne diseases [51]. The

## Climate services for arboviral diseases in the Caribbean

209 country was devastated by Hurricane Maria in September 2017, a category 5 hurricane  
210 that damaged 90% of buildings, resulting in USD 1.3 billion in damages, the equivalent  
211 of 224% of Dominica's GDP in 2016 [52]. This study was conducted in the months prior  
212 to Hurricane Maria. The Ministry of Health and Environment is responsible for arbovirus  
213 and vector surveillance and control.

214 The national health agencies of both countries are supported by the Caribbean  
215 Public Health Agency (CARPHA) and the Pan American Health Organization (PAHO),  
216 the regional arm of the WHO. Each country has its own national meteorological and  
217 hydrological service (NMHS) supported by the Caribbean Institute for Meteorology and  
218 Hydrology, the technical arm of the Caribbean Meteorological Organization (CMO).  
219 Details regarding the mandates and capabilities of the public health and climate national  
220 and regional organizations, with respect to arbovirus and vector surveillance and control,  
221 and climate monitoring and forecasting, are provided in S1 Text.

222

### 223 **Surveys and interviews**

224 We collected data from key stakeholders from the climate and health sectors  
225 spanning senior leadership, managers, and expert practitioners. Stakeholders from the  
226 health sector were engaged in arbovirus epidemiology and vector control, or  
227 environmental health, at national and regional (Caribbean) agencies. Stakeholders from  
228 the climate sector were individuals involved in the development of climate services for  
229 the Caribbean region and managers/practitioners from NMHSs. Interviewees were  
230 identified by local collaborators and through snowball methodology, whereby  
231 interviewees were asked to identify 2-3 additional stakeholders. We determined that we

## Climate services for arboviral diseases in the Caribbean

232 had effectively sampled all key stakeholders when no new names were identified; this  
233 was feasible given the relatively small size of the climate and health sectors in the study  
234 area.

235 A survey instrument was developed for health sector stakeholders. We asked  
236 questions regarding basic demographic information, their perceptions of climate  
237 variability and arbovirus risk factors, perceptions of the public health sector response to  
238 climate variability, current use of climate information, how they prefer to interact with  
239 and receive EWS information, the current strengths and weaknesses of their department  
240 with respect to the implementation of a arbovirus EWS, and their training needs. In the  
241 survey, we defined climate variability as, “short-term changes in climate that occurs over  
242 months, to seasons, to years. This variability is the result of natural, large-scale features  
243 of the climate, often related to El Niño or La Niña events. Examples include floods,  
244 multi-year or seasonal droughts, heat waves, hurricanes or tropical storms.” Questions  
245 were informed by a prior large-scale survey of health practitioner perceptions of climate  
246 change impacts on health conducted in the United States, called “Are We Ready?” [36–  
247 38], as well as studies by Paterson et al. [39] and Gould and Rudolf [35].

248 Printed surveys were distributed to health sector stakeholders at national vector  
249 control, environmental health, and epidemiology offices, as well as those who  
250 participated in national workshops on the development of climate services for arboviruses  
251 in Barbados and Dominica in April 2017. The workshop in Dominica was organized by  
252 the CIMH and the Ministry of Health and Environment (6 health sector participants). The  
253 workshop in Barbados was organized by the PAHO and the CIMH (~21 health sector

## Climate services for arboviral diseases in the Caribbean

254 participants). Survey responses were entered into an online digital database using  
255 Qualtrics and responses were tabulated.

256 An interview instrument was developed for stakeholders from the climate and  
257 health sectors. Questions in the interview and survey were similar so that we could  
258 triangulate and validate the responses. We also asked which organizations they had  
259 partnered with to manage vector borne diseases, which organizations they would like to  
260 partner with, how climate and health fit within their current institutional  
261 priorities/mandates/competencies, and what strategies would stimulate collaboration  
262 between the climate and health sectors. In interviews with program directors, we asked  
263 additional questions about available climate and arbovirus/vector data, as well as  
264 arbovirus and vector surveillance and control strategies, and climate monitoring and  
265 forecasting (see institutional competencies in S1 Text).

266 Project investigators interviewed stakeholders from the climate and health sectors  
267 through in-person meetings or via Skype in April and May 2017. Interviews were audio  
268 recorded following permission from interviewees. Recordings were transcribed and  
269 coded by project investigators to identify responses by research topic, country/region and  
270 sector [53,54].

271 During the Barbados national workshop, we conducted an exercise where health  
272 (n=~21) and climate sector (n=6) participants were divided into small groups that  
273 included representatives from both sectors. Groups were asked to respond to different  
274 forecast scenarios (2 week, 3 month, and 1 year forecasts of *Aedes aegypti* larval indices  
275 and dengue incidence). They were asked to identify the actions that they would take in  
276 response to alerts at each time scale, and they discussed the utility of a vector versus

## Climate services for arboviral diseases in the Caribbean

277 disease forecast. As with interviews, responses were audio recorded, transcribed, and  
278 coded.

279 The survey, interview, and workshop instruments were reviewed and tested by  
280 local collaborators, as well as the research team, prior to implementation. Instruments are  
281 available in S2 Text and S3 Text.

282

### 283 **Results**

284 We surveyed 32 individuals from the health sector and interviewed 41 individuals  
285 from the climate (n=10) and health (n=31) sectors. Respondent demographics are shown  
286 in Table 2. Several individuals participated in both interviews and surveys; however, the  
287 exact number is unknown since identifiable information was not collected from surveys.

**Table 2. Demographics of survey and interview participants**

|                     | Survey    | Interview |
|---------------------|-----------|-----------|
| Responses           | % (n)     | % (n)     |
| Total respondents   | 32        | 41        |
| Female              | 72% (23)  | 56% (23)  |
| Male                | 28% (9)   | 44% (18)  |
| <i>Jurisdiction</i> |           |           |
| Barbados            | 63% (20)  | 37% (15)  |
| Dominica            | 31% (10)  | 41% (17)  |
| Regional            | 6% (2)    | 15% (6)   |
| <i>Sector</i>       |           |           |
| Health sector       | 100% (32) | 76% (31)  |
| Climate sector      | **        | 24% (10)  |

## Climate services for arboviral diseases in the Caribbean

| <i>Range Age</i>              |            |          |
|-------------------------------|------------|----------|
| 18 - 30                       | 9% (3)     | *        |
| 31 - 40                       | 25% (8)    | *        |
| 41 -50                        | 31% (10)   | *        |
| 51-65                         | 25% (8)    | *        |
| > 65                          | 3% (1)     | *        |
| No response                   | 6% (2)     | *        |
| <i>Level of Education</i>     |            |          |
| Associate's degree            | 16% (5)    | 0% (0)   |
| Bachelor's degree             | 22% (7)    | 2% (1)   |
| Master's degree               | 59% (19)   | 20% (8)  |
| MD or PhD degree              | 0% (0)     | 15% (6)  |
| No response                   | 3% (1)     | 61%(25)  |
| <i>Time working in sector</i> |            |          |
| 1- 5 years                    | 3% (1)     | 0% (0)   |
| 6 -11 years                   | 13.5% (4)  | 2% (1)   |
| 12- 15 years                  | 16% (5)    | 5% (2)   |
| > 15 years                    | 62.5% (20) | 20% (8)  |
| No response                   | 6% (2)     | 76% (31) |

288 \*Data not gathered

289 \*\*Only individuals from the health sector were surveyed

290

### 291 **(1) What are the perceptions of climate-health or climate-arbovirus linkages?**

292 *Perceptions of climate variability and health impacts.* In surveys, health  
 293 practitioners were asked to respond to a series of statements about the effects of climate  
 294 variability on health in their jurisdiction and their ability to respond to these effects  
 295 (Likert scale, from strongly disagree to strongly agree, Table 3). Most agreed that their



## Climate services for arboviral diseases in the Caribbean

296 jurisdiction is experiencing an increased risk of diseases transmitted by *Ae. aegypti* due to  
 297 climate variability and that the risk will increase in the future. Survey respondents were  
 298 worried about the effects of climate variability on health, and they agreed that this is an  
 299 urgent problem in their jurisdiction. Although two thirds agreed that there are options or  
 300 solutions to reduce the effects of climate variability on health, they disagreed that they  
 301 had sufficient resources and expertise assess the impacts of climate variability on health  
 302 and to protect residents in their jurisdiction.

303

304 **Table 3. Perceptions of climate variability impacts on health reported by survey**

305 **respondents.** Results shown as % (n). This most common response per question is

306 highlighted in bold. Adapted from [36–38].

| Questions                                                                                                                                         | No response | Don't know | Disagree* | Neither agree nor disagree | Agree*          |
|---------------------------------------------------------------------------------------------------------------------------------------------------|-------------|------------|-----------|----------------------------|-----------------|
| My jurisdiction is currently experiencing one or more serious public health problems as a result of climate variability.                          | 6% (2)      | 3% (1)     | 13% (4)   | 9% (3)                     | <b>69% (22)</b> |
| My jurisdiction is currently experiencing an increased risk of diseases transmitted by <i>Aedes aegypti</i> due to climate variability.           | 3% (1)      | 6% (2)     | 3% (1)    | 9% (3)                     | <b>78% (25)</b> |
| In the next 20 years, my jurisdiction will experience increasing risk of diseases transmitted by <i>Aedes aegypti</i> due to climate variability. | 3% (1)      | 13% (4)    | 3% (1)    | 0 (0)                      | <b>81% (26)</b> |

## Climate services for arboviral diseases in the Caribbean

|                                                                                                                                                                          |         |        |                 |         |                 |
|--------------------------------------------------------------------------------------------------------------------------------------------------------------------------|---------|--------|-----------------|---------|-----------------|
| I am worried about the impact of                                                                                                                                         |         |        |                 |         |                 |
| climate variability on the health and well-being of people in my jurisdiction                                                                                            | 3% (1)  | 0% (0) | 0% (0)          | 3% (1)  | <b>94% (30)</b> |
| <hr/>                                                                                                                                                                    |         |        |                 |         |                 |
| The effects of climate variability on the health of people in my jurisdiction is an urgent problem                                                                       | 3% (1)  | 3% (1) | 0% (0)          | 13% (4) | <b>81% (26)</b> |
| <hr/>                                                                                                                                                                    |         |        |                 |         |                 |
| There are options/solutions to reduce the effects of climate variability and to improve the health of people in my jurisdiction                                          | 3% (1)  | 3% (1) | 16% (5)         | 13% (4) | <b>66% (21)</b> |
| <hr/>                                                                                                                                                                    |         |        |                 |         |                 |
| The people in my jurisdiction are worried about the effects of climate variability on their health and wellbeing.                                                        | 6% (2)  | 3% (1) | 22% (7)         | 13% (4) | <b>56% (18)</b> |
| <hr/>                                                                                                                                                                    |         |        |                 |         |                 |
| My health department currently has ample expertise to assess the potential public health impacts associated with climate variability that could occur in my jurisdiction | 3% (1)  | 0% (0) | <b>41% (13)</b> | 19% (6) | 38% (12)        |
| <hr/>                                                                                                                                                                    |         |        |                 |         |                 |
| Dealing with the public health effects of climate variability is an important priority for my health department                                                          | 6% (2)  | 0% (0) | 13% (4)         | 22% (7) | <b>59% (19)</b> |
| <hr/>                                                                                                                                                                    |         |        |                 |         |                 |
| I am knowledgeable about the potential public health impacts of climate variability.                                                                                     | 3% (1)  | 0% (0) | 16% (5)         | 3% (1)  | <b>78% (25)</b> |
| <hr/>                                                                                                                                                                    |         |        |                 |         |                 |
| The other relevant senior managers in my health department are                                                                                                           | 13% (4) | 3% (1) | 19% (6)         | 13% (4) | <b>53% (17)</b> |
| <hr/>                                                                                                                                                                    |         |        |                 |         |                 |

## Climate services for arboviral diseases in the Caribbean

knowledgeable about the potential

public health impacts of climate

variability.

---

My health department currently has

ample expertise to create an effective  
plan to protect local residents from the  
health impacts of climate variability

6% (2)      6% (2)      **34% (11)**      22% (7)      31% (10)

---

My health department currently has

sufficient resources to effectively  
protect local residents from the health  
impacts of climate variability

9% (3)      6% (2)      **57% (18)**      19% (6)      9% (3)

---

My health department is able to

effectively communicate the health  
impacts of climate variability to local  
communities

9% (3)      0% (0)      31% (10)      19% (6)      **41% (13)**

---

307 \*Agree and strongly agree were combined into one category, as were disagree and strongly disagree

308

309 *Climate and non-climate risk factors for Aedes-transmitted diseases.* Survey

310 respondents were asked to rank climate and non-climate risk factors for epidemics of

311 diseases transmitted by *Ae. aegypti* (Table 4). Non-climate risk factors were identified as

312 more important overall than climate risk factors. The most important non-climate risk

313 factors, in order of importance, were the introduction of new viruses to susceptible

314 populations, water storage behavior, and insecticide resistance in mosquitoes. The most

315 important climate risk factors, in order of importance, were heavy rainfall and drought

316 conditions. The least important risk factors were warm air temperatures, El Niño or La

317 Niña events, and economic barriers to mosquito control by households.

Climate services for arboviral diseases in the Caribbean

318 **Table 4. Factors that trigger epidemics of diseases transmitted by *Aedes aegypti***  
 319 **reported by survey respondents.** Results shown as % (n), listed in order of most to least  
 320 important.

| Categories                                                                                 | No response | Slightly important | Moderately important | Important | Very Important |
|--------------------------------------------------------------------------------------------|-------------|--------------------|----------------------|-----------|----------------|
| Introduction of a new virus to a susceptible population                                    | 0 (0)       | 0 (0)              | 0 (0)                | 9.4 (3)   | 90.6 (29)      |
| Water storage behavior                                                                     | 3.1 (1)     | 0 (0)              | 0 (0)                | 15.6 (5)  | 81.3 (26)      |
| Insecticide resistant mosquitoes                                                           | 0 (0)       | 6.3 (2)            | 6.3 (2)              | 18.8 (6)  | 68.8 (22)      |
| Heavy rainfall                                                                             | 0 (0)       | 3.1 (1)            | 6.3 (2)              | 46.9 (15) | 43.8 (14)      |
| Human movement                                                                             | 0 (0)       | 3.1 (1)            | 6.3 (2)              | 46.9 (15) | 43.8 (14)      |
| Insufficient staff/resources for vector control                                            | 0 (0)       | 0 (0)              | 12.5 (4)             | 43.8 (14) | 43.8 (14)      |
| Lack of community knowledge and awareness                                                  | 0 (0)       | 3.1 (1)            | 15.6 (5)             | 37.5 (12) | 43.8 (14)      |
| Limited community engagement/mobilization                                                  | 0 (0)       | 3.1 (1)            | 6.3 (2)              | 56.3 (18) | 34.4 (11)      |
| Drought conditions                                                                         | 3.1 (1)     | 31.3 (10)          | 9.4 (3)              | 25 (8)    | 31.3 (10)      |
| High-risk housing conditions                                                               | 9.4 (3)     | 12.5 (4)           | 21.9 (7)             | 25 (8)    | 31.3 (10)      |
| Low risk perception by communities                                                         | 3.1 (1)     | 3.1 (1)            | 12.5 (4)             | 50 (16)   | 31.3 (10)      |
| Economic barriers to mosquito control by households (e.g., cost of screens or insecticide) | 0 (0)       | 9.4 (3)            | 31.3 (10)            | 34.4 (11) | 25 (8)         |
| El Niño or La Niña events                                                                  | 3.1 (1)     | 6.3 (2)            | 18.8 (6)             | 50 (16)   | 21.9 (7)       |
| Warmer air temperatures                                                                    | 6.3 (2)     | 25 (8)             | 18.8 (6)             | 31.3 (10) | 18.8 (6)       |

321

## Climate services for arboviral diseases in the Caribbean

322 Interviewees were also asked to discuss climate and non-climate risk factors for  
323 arbovirus epidemics. They indicated that frequent (re)-introduction of viruses and vectors  
324 was associated with human movement between the islands due to trade and tourism. In  
325 Dominica, interviewees also identified human movement between rural and urban areas  
326 as a risk factor.

327 Interviewees identified the onset of the hot, rainy/wet season as a risk factor for  
328 arbovirus transmission, although they indicated that the linkages between rainfall and  
329 dengue fever have become less apparent due to water storage practices. Two interviewees  
330 highlighted this contradiction,

331 "If the rain falls very heavily, within two weeks expect to have an increase in  
332 number of cases. It's always associated with rainfall" (Health Sector, Barbados).

333 "With these droughts, there doesn't seem to be, in the last few years, a real  
334 dengue season" (Health Stakeholder, Barbados).

335 In Barbados, interviewees indicated that household water storage was associated  
336 with drought conditions and the resulting water scarcity. Another risk factor was the  
337 national legislation requiring that all new buildings greater than 1500 square feet have  
338 rainwater storage receptacles as a drought adaptation strategy; however, the receptacles  
339 have become mosquito larval habitat. Interviewees indicated that the improper  
340 management of public utilities and infrastructure (e.g., telephone junction boxes, manhole  
341 covers, public wells, drains) had resulted in cryptic mosquito larval habitats that were  
342 difficult to find and treat during the wet season.

343 In Dominica, interviewees commented that water storage had increased following  
344 Tropical Storm Erika (2015). The storm damaged the piped water systems and people

## Climate services for arboviral diseases in the Caribbean

345 began storing freshwater in 55-gallon drums around the home. This behavior continued  
346 despite repairs to water systems. One interviewee described the effects of Erika,  
347 "After the Tropical Storm Erika, everything just got a little more vulnerable than  
348 it used to be... it was just one downpour of rain that caused all of the destruction"  
349 (Health Stakeholder, Dominica)

350 Interviewees from Dominica noted that *Ae. aegypti* had expanded its range into higher  
351 elevation areas, where the mosquito had not been present historically.

352 *Other effects of climate on health.* Interviewees were asked to identify other ways  
353 that climate affected health in their jurisdiction. They identified a wide range of  
354 interrelated health effects associated with climate, including increased risk of morbidity  
355 due to the interaction of heat stress and diabetes associated with hotter days and nights,  
356 leptospirosis (*Leptospira* sp.) associated with flooding, and communicable diseases  
357 associated with relocation and crowding of people in shelters following tropical storms.  
358 They indicated that malnutrition was associated with droughts that reduced crop yields  
359 and warming ocean temperatures that caused fish kills. Respiratory problems (e.g.,  
360 asthma) were associated with dry weather, dust and air pollution. Factors unique to  
361 Barbados included hypertension due to sea level rise and salt-water intrusion in the  
362 groundwater supply, reduced hygiene and *Pseudomonas* infections due to water scarcity  
363 and storage, skin cancer due to UV exposure, and water-borne diseases (e.g.,  
364 gastroenteritis, *Salmonella*) associated with flooding. Factors unique to Dominica  
365 included loss of lives due to landslides associated with tropical storms, gastroenteritis  
366 associated with dry weather, and mental health morbidity in the elderly and other

## Climate services for arboviral diseases in the Caribbean

367 vulnerable populations who are relocated after tropical storms. One informant described  
368 the complex web of causality associated with the effects of climate on health,

369 "[During droughts] people are not able to go to their farms, they don't have food  
370 and their nutrition suffers. They don't have income... they cannot get their  
371 medications... So its just the rippling effect" (Health Stakeholder, Dominica).

372 Interviewees stressed the need to strengthen the evidence base linking climate and  
373 health in their jurisdictions. They recognized that most of these linkages were anecdotal  
374 or hypothetical, since there have been few local studies on climate and health, as  
375 summarized by one interviewee,

376 "So we have *not been able* to make a direct link between those diseases and  
377 climate variability and change; however, we know that there has been an increase  
378 as a result of climate variability... The data to make that linkage... is not really  
379 always available" (Health Stakeholder, Dominica).

380 Interviewees from the Barbados NMHS indicated that they had limited experience with  
381 climate research, and that this was an area that they were interested in expanding.

382 National-level health sector interviewees displayed a high level of field experience and  
383 local knowledge, but they indicated that they had little knowledge of empirical studies  
384 that could inform their decision-making and planning processes. As stated by one  
385 interviewee,

386 "We want more evidence-based decision-making. We want data... That's priority  
387 #1... to get the evidence." (Health Stakeholder, Regional)

388 Interviewees recommended conducting case studies, or demonstration projects, in the  
389 region to generate local evidence on climate-health linkages. They suggested focusing

## Climate services for arboviral diseases in the Caribbean

390 these investigations and interventions at the medium-term climate variability timescale  
391 (e.g., seasonal variation, year-to-year variation in extreme climate events), rather than the  
392 long-term climate change time scale.

393

394 **(2) Who are the key actors engaged in climate-arbovirus surveillance and control,**  
395 **and how to strengthen communication and partnerships amongst these actors?**

396 *Partnerships.* Interviewees identified diverse national and international agencies  
397 and funders engaged in climate-arbovirus surveillance and control (Figure 2). The key  
398 regional institutions were the PAHO, the CARPHA, and the CIMH. The Red Cross was  
399 the most frequently mentioned non-governmental organization (NGO). The health sectors  
400 engage periodically with their respective NMHS on specific projects; however, there are  
401 no formal collaborations. Understanding and mitigating the effects of climate on health  
402 are relatively high priorities in the health sector, but climate and health is not yet a  
403 mandate (S1 Text). Similarly, the NMHS do not have a mandate to work on climate and  
404 health. As a result, it has been difficult to allocate resources (e.g., personnel, funding) to  
405 this area. Interviewees indicated that the key partnerships to be strengthened were the  
406 private sector (tourism, vector control companies, media), academic institutions, and civil  
407 society organizations.



## Climate services for arboviral diseases in the Caribbean

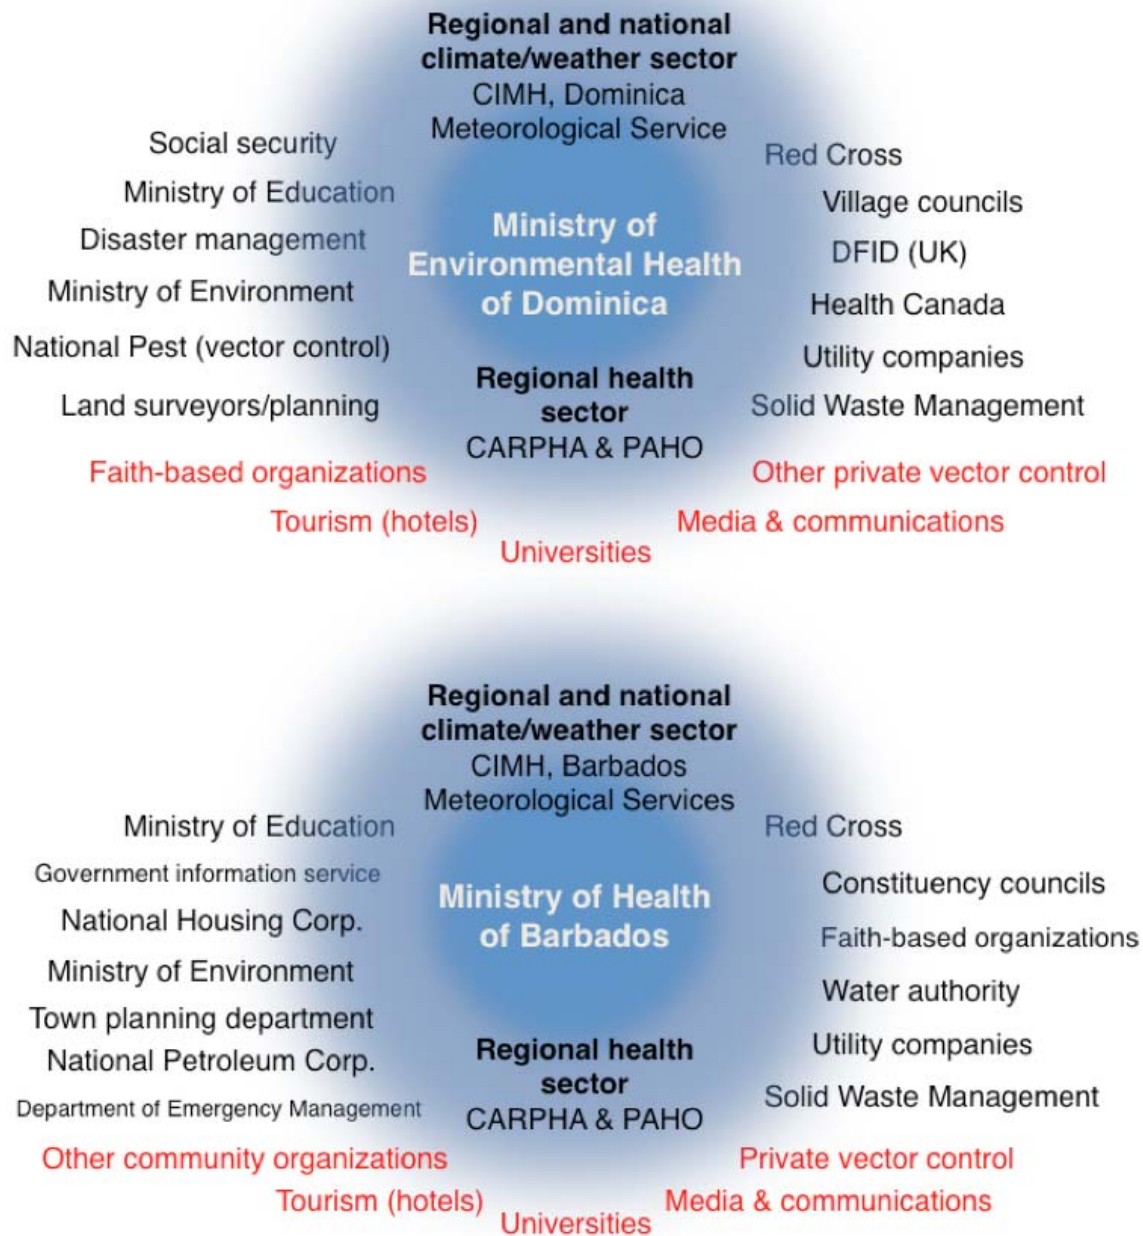

408

409 **Figure 2. Stakeholder analysis.** Organizations (in black) that work with the health sector

410 in Barbados and Dominica on issues related to vector control and climate services for

411 health. Organizations in red were identified as needing a stronger relationship with the

412 health sector.

413

## Climate services for arboviral diseases in the Caribbean

414        *Collaboration strategies.* Interviewees identified six strategies to strengthen the  
415        communication and partnerships amongst these actors. First, they highlighted the  
416        importance of an integrated approach to the development of climate services for health  
417        spanning research, operations, a platform for data and knowledge sharing, outreach,  
418        awareness raising, education, an in-country response, and mitigation plans and policies.  
419        Second, interviewees emphasized the importance of engaging senior leaders from the  
420        health sector to raise the profile of climate and health on the health agenda, and to ensure  
421        that actions are driven from the top-down. Third, they highlighted the importance of  
422        formal collaboration agreements amongst climate, health, and other sectors, similar to the  
423        multi-lateral agreements recently signed amongst the CIMH, the CARPHA and other  
424        regional Caribbean agencies. Interviewees indicated that collaboration agreements would  
425        allow them to co-develop and co-deliver climate services for the health sector.  
426        Interviewees perceived that collaboration agreements signaled a strong commitment from  
427        institution directors and an understanding of mutual benefit. Fourth, they suggested that  
428        national committees on climate and health be established to specify the work that would  
429        be done jointly, the roles of each partner, a timeline for an operational plan, and standard  
430        operating procedures (SOPs) with a framework for communication, data sharing, and  
431        reporting guidelines. Fifth, interviewees indicated the importance of creating shared  
432        spaces for dialogue between the climate and health sectors, such as regional and national  
433        climate and health forums. An interviewee from the climate sector stated,  
434               “Just sitting with people in the sectors makes such a big difference... Understand  
435               them, what drives them, what are their needs? Because we might think they need  
436               something they don’t... Sometimes it’s about forgetting yourself and putting

## Climate services for arboviral diseases in the Caribbean

437           yourself in the other person’s shoes to really figure out what the need is about.

438           That’s true engagement” (Climate Stakeholder, Regional).

439   This engagement would help to build functional working relationships and increase the  
440   trust among people in both sectors, allowing sectoral stakeholders to learn about the  
441   needs and perspectives of the other, what information can be shared, and the resources  
442   available to help each other. One interviewee stated,

443           “Once we build the trust, then we build the network, then we can see what the  
444           willingness to collect, to centralize, to digitize, and to share the data really is”  
445           (Climate Stakeholder, Regional).

446   For example, interviewees suggested that the MoH could partner with their NMHS to  
447   ensure that new weather stations are placed in areas that are strategic for the surveillance  
448   of arboviruses. Representatives from the NMHS could participate in the regular  
449   epidemiological surveillance meetings of the MoH. Last but not least, interviewees  
450   suggested that climate services for health be framed as a national development priority, a  
451   strategy that would increase buy-in from decision makers and funding from international  
452   development agencies. One informant stated,

453           “I think people will embrace climate and health... [it is] a real sustainable  
454           development goal... Health has always been a critical sector” (Climate  
455           Stakeholder, Regional).

456

457   **(3) What are the current capabilities of the health and climate sectors to implement**  
458   **a climate-driven arbovirus EWS? What capacities need to be strengthened?**

## Climate services for arboviral diseases in the Caribbean

459 Health sector survey respondents were asked to identify the strengths and  
460 weaknesses of their institution with respect to the implementation of an arbovirus EWS  
461 (Figure 3). The top strengths were effective public health messaging to communities,  
462 effective health surveillance infrastructure, knowledge of the effects of climate on vector  
463 borne diseases, strong coordination with other institutions, and community mobilization.  
464 The top weaknesses, or areas to be strengthened, were the availability of financial  
465 resources and expertise in geographic information systems (GIS), statistics, modeling,  
466 and computer programming (S4 Table for software currently used in health departments  
467 and S5 Table for preferred training activities).

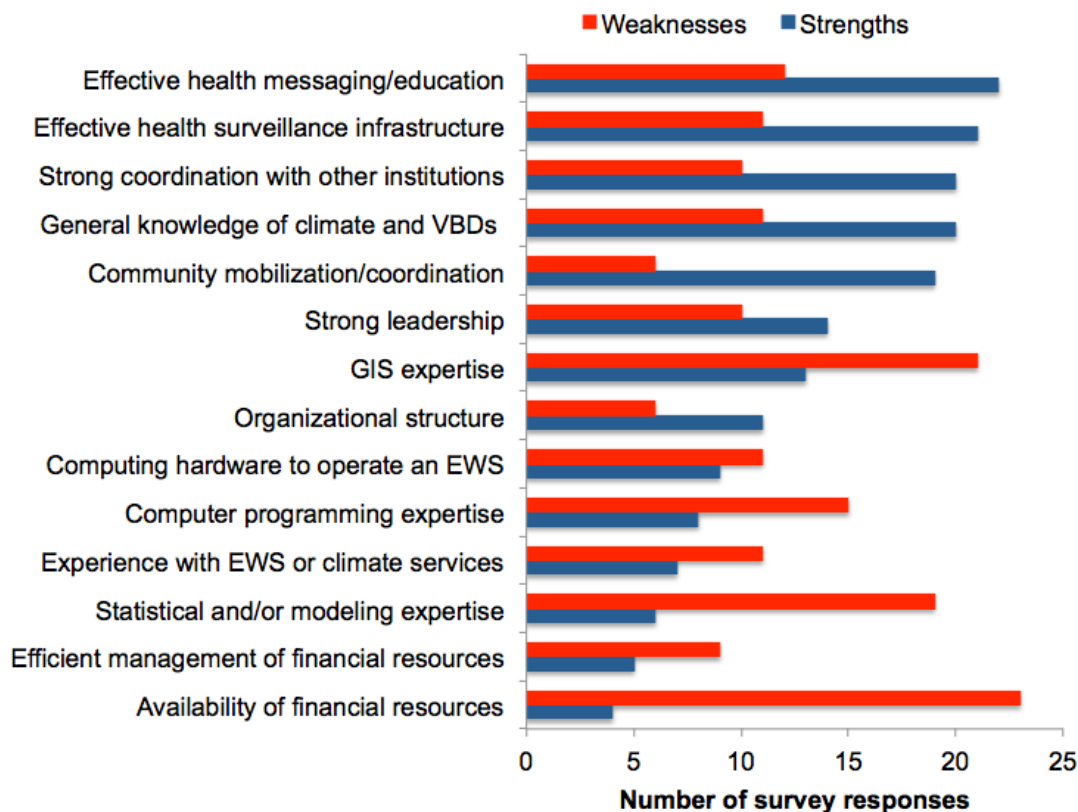

468

469 **Figure 3. Perceptions of the strengths and weaknesses of the health sector with**  
470 **respect to the capacity to implement an EWS for *Aedes aegypti* transmitted diseases.**

471 EWS = early warning system, GIS = geographic information system, VBDs = vector  
472 borne diseases

473

## Climate services for arboviral diseases in the Caribbean

474 Interviewees highlighted the need to train, nurture, and retain a cohort of  
475 practitioners with expertise in climate and health. Health sector interviewees emphasized  
476 the need to increase their skills in modeling and data analysis through technical  
477 workshops on how to use climate information, data, models and other tools to predict  
478 epidemics. They identified the need for training on climate and health linkages, greater  
479 understanding of climate services for health, how to use climate services for health during  
480 emergencies/disasters, and how to communicate the effects of climate on health to local  
481 communities. They suggested that training activities be practical and interactive, such as  
482 workshops where multisectoral teams respond to simulations of epidemic warnings.

483 Health sector interviewees also expressed an urgent need for training on  
484 geographic information systems (GIS). They found that GIS was a highly effective tool  
485 that allowed them to use field data to make informed decisions, and to communicate risk  
486 information back to the public.

487 “It is so much easier, better, to use maps when you are doing presentations.  
488 Especially if you are doing something with the public where you can actually  
489 show them their community and say, ‘There you have breeding sites. There is  
490 where you have the problem.’ And they can actually see it. You can actually show  
491 it to them.” (Health Stakeholder, Dominica).

492 In Dominica, interviewees highlighted the need for vector control specialists in the MoH,  
493 since their environmental health officers are responsible for a broad portfolio of activities  
494 and are trained as generalists. Interviewees from both countries highlighted the need for  
495 better data collection and storage practices in the health sector in order to create high-  
496 quality, long-term datasets.

## Climate services for arboviral diseases in the Caribbean

497 NMHS (national climate sector) interviewees indicated that they had limited  
498 capacity to implement climate services for health. Interviewees from Barbados and  
499 Dominica indicated the need for additional personnel, as well as a better understanding of  
500 health sector end-user needs Interviewees from the Dominica NMHS indicated that they  
501 had difficulty reaching the meteorological stations to download data due to the complex  
502 topography of the country. They identified the need for basic resources to increase their  
503 monitoring and forecasting capacities, including a staff meteorologist, adequate  
504 transportation to and from meteorological stations, financial resources, instrumentation,  
505 and improved security to prevent vandalism the meteorological stations. They stated,  
506 “We use our personal vehicles, but some of the areas are a bit challenging, and we  
507 are two females, so sometimes ...depending on where we are going, we need  
508 somebody else to go with us, for security" (Climate Stakeholder, Dominica).  
509 Health sector interviewees from Dominica suggested that their technicians could be  
510 trained to download data from meteorological stations to support the local NMHS.

511

512 **(4) What climate/weather data are currently used by the health sector for arbovirus**  
513 **control, what is the added value, and how can climate/weather data be effectively**  
514 **mainstreamed for arbovirus control operations?**

515 *Use of climate information.* Health sector survey respondents were asked about  
516 their current use of climate information (S6 Table). Two thirds of respondents indicated  
517 they had received general information on the effects of climate on vector borne diseases,  
518 and half of the respondents confirmed that climate information was used for some level  
519 of planning for disease and vector control interventions. They were unsure as to whether

## Climate services for arboviral diseases in the Caribbean

520 an EWS for arboviruses existed in their jurisdiction, but most indicated that climate  
521 information was not part of existing epidemiological warning systems.

522 Interviewees confirmed that the arbovirus alert systems in Dominica and  
523 Barbados were based solely on epidemiological surveillance. The health sector and  
524 PAHO issue an alert when the number of reported cases surpasses a pre-determined  
525 threshold established by the historical average for the same week or month (see Lowe et  
526 al. [11] for details). Interviewees indicated that the current system did not provide  
527 sufficient lead-time to effectively reduce the threat of an epidemic.

528 Interviewees described the current use of climate information for arbovirus  
529 control. The health sector considers wet/dry seasons and extreme climate events when  
530 planning vector control programs, for example, by increasing larviciding efforts at the  
531 onset of the wet season or increasing community campaigns on safe water-storage during  
532 droughts. Occasionally the health sector requests climate/weather information from their  
533 NMHS and the data are generally shared as Excel files. However, they do not formally  
534 incorporate climate information, such as seasonal climate forecasts, into their planning  
535 process. Overall, climate information was reported to play a minor role in decision-  
536 making, which was instead driven by policies, regulations, and specific competencies of  
537 the organizations.

538 *Forecast scenarios.* At the national workshop in Barbados, health and climate  
539 stakeholders were asked to identify the interventions they would implement if they were  
540 provided with short (2 week), medium (3 month) and long-term (1 year) forecasts of  
541 vector abundance and dengue incidence (S3 Text). They unanimously stated that disease  
542 incidence forecasts would be more effective than vector forecasts in garnering the



## Climate services for arboviral diseases in the Caribbean

543 political attention necessary to mobilize resources to implement preventative  
544 interventions. With a short-term forecast, the health sector would increase education,  
545 community mobilization, and larval source reduction, especially in known hotspots. With  
546 a medium-term forecast, the health sector would be better able to plan with stakeholders,  
547 mobilize the field team, look at trends, and create bulletins for community mobilization.  
548 With a long-term forecast the health sector could better lobby with health sector  
549 leadership and the Minister of Finance for the needed financial support, allowing for  
550 more effective budgeting. They would be able to monitor and evaluate interventions and  
551 conduct a needs assessment to inform planning. They would also be able to procure  
552 diagnostic reagents and supplies for the national reference laboratory, a process that can  
553 take up to 6 months. Although the workshop participants identified meaningful  
554 interventions at each timescale, they preferred the medium-term (3-month) forecast as  
555 indicated in the following,

556       “A year can feel like a long time away. With 3 months, there will be a sense of  
557       urgency and you can do meaningful activities, although there might not be new  
558       resources” (Health Stakeholder, Barbados).

559       *Added value of climate services.* Health sector interviewees highlighted the ways  
560 in which climate services would improve their planning for arbovirus interventions. By  
561 integrating climate and/or disease forecasts into their seasonal and annual planning  
562 processes, they felt they could be proactive and more effective at preventing outbreaks, as  
563 described by this interviewee,

564       "We know we have *Aedes*, we know we have the threat, but its only when  
565       outbreaks happen, we start scrambling around to do things. So I think if we can



## Climate services for arboviral diseases in the Caribbean

566 put mechanisms in place, long in advance, then we can have more success in  
567 dealing with outbreaks. Or we can even prevent outbreaks" (Health Stakeholder,  
568 Dominica)

569 Interviewees indicated that climate services have to provide reliable information early  
570 enough such that the health sector can target control efforts in high-risk areas during  
571 certain times of the year. This would result in a more efficient use of limited financial and  
572 human resources, as described by this interviewee,

573 "When you know that there is an impending threat, you would come up with  
574 specific activities that you would conduct. It doesn't necessarily mean that those  
575 activities would be at a higher cost, but you can be more specific... It will be  
576 easier for us to respond to an impending threat, instead of running around"  
577 (Health Stakeholder, Dominica).

578 Interviewees indicated that forecasts of disease risk could be used to inform hospitals  
579 about staffing needs, stocking of medicines and laboratory diagnostic reagents, and the  
580 development of targeted educational materials for the public. They suggested that  
581 warnings be communicated to the public through social media and other outlets to  
582 motivate community mobilization for preventative practices. Interviewees indicated that  
583 they would feel more motivated and inspired in their day-to-day work if they could see  
584 how the data that they collect was being used to inform decision-making.

585 *Mainstreaming climate services.* Health sector survey respondents were asked  
586 how they would prefer to receive information from an arbovirus EWS. The top responses  
587 were: a climate and health bulletin (91%), an interactive GIS platform (66%) and internal  
588 meetings within their departments (59%) (S7 Table).

## Climate services for arboviral diseases in the Caribbean

589 Interviewees were also asked to identify climate services that would improve their  
590 day-to-day work related to arboviruses. Health sector interviewees confirmed that they  
591 were interested in utilizing the Caribbean Health Climatic Bulletin launched in 2017 by  
592 the CIMH, the CARPHA and the PAHO. The bulletin qualitatively summarizes potential  
593 health impacts for a 3-month period based on seasonal climate forecasts  
594 (<https://rcc.cimh.edu.bb/health-bulletin-archive/>). Health sector interviewees also  
595 reiterated that a GIS platform would allow them to integrate and analyze real-time  
596 information on disease epidemiology, entomology, and climate. They could use this  
597 platform to produce risk maps showing the spatial distribution of mosquito vectors and  
598 disease risk in relation to rainfall, temperature, and other climate information. They  
599 suggested that these forecasts be converted into spatiotemporal alerts using a color-  
600 coding scheme. Other ideas for climate services included the use of wind speed and wind  
601 direction forecasts to inform insecticide fogging operations. One informant summarized  
602 the health sector needs in the following,

603 “We need it [climate services] packaged in such a way that the health professional  
604 would understand. Pick it up, and look at it, and understand it” (Health  
605 Stakeholder, Dominica).

606 "Decision makers at the policy level are not healthcare providers. They are  
607 administrators, they are politicians, and we need to help them. We need to feed  
608 them [decision makers] with the kind of information they can understand, and [so]  
609 they can feel comfortable making decisions" (Climate and health workshop  
610 participant, Barbados).

611

## Climate services for arboviral diseases in the Caribbean

### 612 **Discussion**

613           Small island developing states (SIDS) in the Caribbean region are amongst the  
614 most vulnerable countries in the world to climate change [1,2]. The effects of a changing  
615 climate include increased frequency and severity of droughts and increased frequency of  
616 tropical storms and hurricanes. Extreme climate events affect directly or indirectly most  
617 dimensions of people's well-being, including mental and physical health, food, housing,  
618 freshwater, and livelihoods. Huang et al [55] state that public health sector adaptation to  
619 climate change should consist of both adaptive-capacity building and implementation of  
620 adaptation actions. A climate-driven arbovirus EWS is a key adaptation action. However,  
621 our study confirms that this will only be possible if current capacities are increased in the  
622 Caribbean region. Prior reports have noted the embryonic status of the application of  
623 climate science in the Caribbean health sector [24] and an assessment of on the capacity  
624 of the network of Caribbean NMHSs to deliver climate services that found that only one  
625 NMHS offered specialized climate information services for the health sector [56].

626           Global research on climate services has identified characteristics or conditions to  
627 develop a usable science that can be mainstreamed for public health operations. The first  
628 phase is to establish an enabling environment for partnership with different stakeholders.  
629 This is done by identifying the common priorities, needs for research, and by building  
630 necessary capacities for understanding among climate and public health stakeholders and  
631 researchers [57,58]. In this study we identified some of the challenges involved in  
632 initiating a successful process of joint collaboration between the climate and public health  
633 sectors. This partnership is critical to ensure commitment and ownership by different  
634 stakeholders and end-users as climate services are developed.

## Climate services for arboviral diseases in the Caribbean

635           In this study, climate services for health, specifically for *Ae. aegypti*-transmitted  
636 arboviral diseases, were considered because high policy level organizations  
637 (PAHO/WHO, CIMH, CARPHA) are encouraging the application of the GFCS. The  
638 WHO recently developed a guide for the operational development of climate resilience  
639 water [59] and health systems [60]. This initiative acts in synergy with the GFCS and  
640 describes how existing systems can include climate information in their operations to  
641 reduce the impacts of climate change on human health. We found that the sustainability  
642 of these initiatives will require the political will to establish climate services for health as  
643 a mandate in the NMHS and public health sectors, allowing them to work in  
644 interdisciplinary and intersectoral teams. The benefits of these decisions could extend to  
645 other government agencies and the private sector, such as the Ministry of Environment or  
646 Ministry of Tourism, as well as regional universities, research centers, and sustainable  
647 development agencies. A clear opportunity was the “Third Global Conference on Health  
648 and Climate: Special Focus on SIDS,” which was held in Grenada in October 2018. The  
649 meeting convened Caribbean Ministers of Health, Ministers of Environment,  
650 representatives from UN agencies and other key stakeholders to develop an Action Plan  
651 on Health and Climate Change for the Caribbean [61].

652           We found that the national climate sectors (NMHSs), in particular, identified  
653 capacity challenges when asked about engaging in work on climate and health. We also  
654 found that the regional climate stakeholders were more experienced with climate services  
655 for health than local NMHS stakeholders. Prior assessments of the NMHSs in the  
656 Caribbean also noted that there is limited technical capacity of local level staff, especially  
657 on smaller islands like Barbados and Dominica [56]. In recent research, representatives

## Climate services for arboviral diseases in the Caribbean

658 from the NMHSs recommended transitioning from a designation of NMHS to become  
659 “National Climate Services Centers (NCSC),” which would facilitate the development of  
660 climate services at the national level [56].

661         Despite major advances in climate science and climate-health research globally,  
662 our results confirm that climate information is neither routinely applied nor used in  
663 planning interventions in Barbados or Dominica. To date, there has been limited success  
664 in developing operational climate services for dengue, although several studies have  
665 demonstrated the potential [17,62–68]. One of the most promising examples of a climate-  
666 driven dengue forecast model framework was recently described by Lowe et al. for  
667 Barbados [11]. Distributed lag nonlinear models [69] were coupled with a Bayesian  
668 hierarchical mixed model [66] to quantify the nonlinear and delayed impacts of climate  
669 factors, such as drought and extreme rainfall, on dengue risk in Barbados from 1999 to  
670 2016. The study found that drought periods followed by a combination of warm and wet  
671 weather several months later could provide optimum conditions for imminent dengue  
672 outbreaks. The developed model successfully predicted a high probability of dengue  
673 outbreaks versus non-outbreaks in most years, with improved performance during El  
674 Niño years. However, model performance in 2015-2016 was compromised by the lack of  
675 data on the emergence of chikungunya and Zika in the region in the prior years. Seasonal  
676 climate forecasts routinely produced by the Caribbean Institute for Meteorology and  
677 Hydrology could be incorporated in the model framework as an early warning tool. This  
678 could help the health sector to plan interventions that mitigate the impact of mosquito-  
679 borne disease epidemics in the region up to three months in advance.

## Climate services for arboviral diseases in the Caribbean

680           The results of this study highlight the need for local research on climate-health  
681 linkages, particularly at the climate variability time scale. In some cases, policy makers  
682 and practitioners may be better able to plan interventions and to allocate resources at this  
683 intermediate season-to-season timescale, as compared to the long-term climate change  
684 timescale. Forecasts of extreme climate events can inform Disaster Risk Reduction  
685 (DRR) interventions as well as health interventions for the most vulnerable groups.  
686 Local climate-health research would engender collaborative scientific articles with co-  
687 authors from the climate and health sectors, thus facilitating data sharing, building trust,  
688 and fomenting a culture of research on climate and health. Development of data sharing  
689 protocols between the climate and health sectors is a priority given the sensitivity of  
690 sharing health information.

691           Health sector stakeholders demonstrated concern, awareness and a high-level  
692 understanding of the impacts of climate variability on arboviruses and health in general.  
693 Prior research in the Caribbean [42] found that there was limited knowledge about  
694 climate and health linkages amongst nurses and doctors in private and public sectors.  
695 However, this study focused on health sector practitioners and decision makers engaged  
696 in environmental health and vector borne diseases, which may account for their greater  
697 awareness and concern. More recent studies in the Caribbean confirm a relatively high  
698 level of awareness and concern amongst health-care providers [41], similar to studies in  
699 the U.S. [36,38]. Several capacity building initiatives undertaken by regional institutions  
700 such as CARPHA and PAHO have likely contributed to higher levels of climate-health  
701 awareness over time. However, our findings suggest that the public health sector does not  
702 feel ready to develop and implement an EWS or other adaptation measures due to limited

## Climate services for arboviral diseases in the Caribbean

703 institutional capacity (resources and expertise), as found in prior studies in the U.S. and  
704 Canada [35–39,55].

705         With respect to expertise, we identified a demand for basic training to increase  
706 technical knowledge on climate and health linkages. There is the opportunity to create  
707 capacity building programs focused on climate and health, which would support the  
708 creation of a cohort of practitioners, decision makers, and researchers who are specialized  
709 in this area, thus providing long-term sustainability for a program on climate and health.  
710 Interviewees proposed that joint training activities across the climate and health sectors  
711 would increase knowledge while strengthening the intersectoral partnership. An  
712 interdisciplinary approach is needed for successful implementation of climate services for  
713 health.

714         Our findings suggest that technical skills are most needed in the health sector,  
715 including GIS, statistics, modeling and computer programming. The health sector  
716 currently uses basic tools for disease mapping. It is important to assess local user-needs  
717 in order to develop tailored visualizations that are useful and relevant. This is an  
718 opportunity for co-production with health and other sectors such as urban planning,  
719 disaster risk management, city utilities and services. Developing targeted training in GIS  
720 that is driven by user-needs will help in visualization and data analysis at the local level.  
721 Additionally, there is the opportunity to develop a fuller range of user-friendly  
722 tools/instruments that can be applied by the health sector without specialized expertise in  
723 their routine data and reporting activities. The operational co-production of tools and  
724 products, such as the quarterly Caribbean Health Climatic Bulletin by the CARPHA, the  
725 PAHO and the CIMH, is a noteworthy first step. The bulletin includes qualitative expert

## Climate services for arboviral diseases in the Caribbean

726 statements on probable health risks associated with seasonal climate forecasts (3 months  
727 ahead). However, there is significant scope for the development of the next generation of  
728 climate services that focus on quantitative probabilistic forecasts of disease risk [24].  
729 Overall, the appropriate involvement of stakeholders is a key element to identify users'  
730 needs, to develop users' capacities and to exploit existing capabilities.

731 *National-level opportunities.* With respect to financial capacity, the Caribbean  
732 climate and health sectors are beginning to work together to attract the resources needed  
733 to increase local capacities to develop climate services for the health sector. Stakeholders  
734 recommended framing climate services for health as a national development priority,  
735 thereby attracting funding from international development agencies. A high-level policy  
736 goal may enhance the partnership between climate and health government institutions.  
737 For example, the Sustainable Development Goals (SDG), and the Paris Climate  
738 Agreement are international policies that have common priorities and objectives: good  
739 health and wellbeing (Objective 3), climate action (Objective13), and partnership for the  
740 goals (Objective 17) [70,71]. The Paris Agreement recognizes the need to strengthen the  
741 global response to the threat of climate change and to significantly reduce the risks of  
742 climate change (Article 2.1), including the risk to human health [72]. Thus it is critical to  
743 develop national policy interactions within the SDGs, to avoid policymakers and public  
744 health planners operating in silos [55,73].

745 The National Development Plan, National Adaptation Plan for Climate Change,  
746 and National Disaster Management Plans are policy documents being developed by most  
747 countries in the Caribbean. The PAHO has also led recent efforts to develop Health  
748 National Adaptation Plans focused on climate resilient health systems for Caribbean



## Climate services for arboviral diseases in the Caribbean

749 SIDS [73]. These documents provide a policy mechanism to establish lines of  
750 intersectoral and interdisciplinary work, which can include the development of climate  
751 services for health. Climate change adaptation/mitigation measures are part of the  
752 National Determined Contributions (NDCs) that nations develop under the Paris  
753 Agreement. Many of those measures can generate co-benefits or added value for the  
754 health sector; co-benefits are the additional benefits that result when nations act to control  
755 climate change [35]. For example, adaptation efforts aimed at improving water  
756 management could also reduce the burden of water-borne or vector-borne diseases [59].  
757 However, specific measures need to be identified, monitored and evaluated to be included  
758 into the country National Determined Contributions (NDCs) to be reported to the United  
759 Nations Framework Convention on Climate Change (UNFCCC). This approach also  
760 offer the possibility to access funding from the Green Climate Fund (GCF) in priority  
761 sectors such as health, food, water security, and livelihoods of people and communities.  
762 For example, the GCF recently approved (March 2018) and co-funded a 5 year project,  
763 “Water Sector Resilience Nexus for Sustainability in Barbados” [74].

764       Beyond the climate and health sectors, we identified a complex web of  
765 institutional actors who can engage strategically in the development of climate services  
766 for health including: a) Water agencies and their climate change and SDG goals related to  
767 water supply, and water quality (drinking and wastewater) because of their potential links  
768 to vector- and water-borne diseases, b) disaster risk management agencies that deal with  
769 hydroclimatic risks that impact vulnerable populations and key infrastructure, c) tourism,  
770 to protect visitor health, as well as considering human mobility a critical factor for  
771 disease transmission, d) private sector vector control companies, e) community based

## Climate services for arboviral diseases in the Caribbean

772 organizations, and f) academic partners, such as the University of West Indies.  
773 Identifying priorities and gaps in specific information would strengthen the partnership  
774 amongst the sectors, making more effective the development of climate services for  
775 human health beyond the ministries and offices of public health [75,76].

776 *Regional-level opportunities.* In its role as the Regional Climate Centre (RCC),  
777 the CIMH leads the implementation of the GFCS in the Caribbean. In its thrust to  
778 develop sector-specific climate information, the CIMH has pursued an interdisciplinary  
779 team approach that leverages the synergies offered by lead technical institutions who are  
780 intimately familiar with their national, regional and sectoral contexts, and can  
781 consistently invest in the co-production of user-driven climate early warning information  
782 [56,77]. The Consortium of Regional Sectoral Early Warning Information Systems across  
783 Climate Timescales (EWISACTs) Coordination Partners is an inter-institutional alliance  
784 for climate resilience that in its form and function reflects good practice that prioritizes  
785 cross-sectoral, interagency models of climate service delivery over those that follow a  
786 silo-ed ‘build it and they would come’ approach [24]. As of 2015, the CIMH has actively  
787 worked on an emerging, multi-pronged health-climate portfolio in collaboration with  
788 national and regional partners such as Ministries of Health, NMHSs, the CARPHA, the  
789 PAHO, and other international, interdisciplinary research partners [24]. New and  
790 emerging research is being conducted to investigate the linkages between climate and  
791 vector borne diseases, heat and health, as well as, Saharan dust and health [24]. Work is  
792 also being done in climate and agriculture, which supports health and nutrition.

793 The Caribbean Community (CARICOM), a group of 20 Caribbean countries, has  
794 mandated the Caribbean Community Climate Change Centre to mainstream climate

## Climate services for arboviral diseases in the Caribbean

795 change adaptation strategies into the sustainable development agendas (UNESCO, 2017).  
796 For the Caribbean Region, regional perspectives and considerations are relevant for all  
797 the countries [78,79]. Successful projects and tools developed in pilot projects, as done in  
798 Barbados [11], can be replicated in similar setting in other countries. A demonstration of  
799 the benefits of climate services for arbovirus interventions in one country can be used as  
800 a model for other productive sectors (tourism, water supply, disaster risk management),  
801 and other countries in the region. Regional institutions should work in cooperation to  
802 build technical capacities and resilient communities across the region. This is already  
803 happening through the Sectoral EWISACTS portfolio and the work of its multi-  
804 institutional Consortium, is increasing expertise and awareness of users and providers.  
805 CIMH plans to strengthen their RCC platform for engaging stakeholders to share lessons  
806 and promote awareness of climate services based on user-needs for all sectors.

807

### 808 **Limitations**

809 When comparing the results of this study to prior studies on health sector  
810 perceptions of climate, one key difference is that our study focused on people working  
811 with arboviruses, environmental health, and climate, whereas other studies focused on  
812 health-care providers or public health professionals in general. However, given the  
813 relatively small size of the health sector in Barbados and Dominica, we interacted with  
814 most senior leadership in interviews and national consultations, in particular those  
815 involved with overall management of the public health sector, epidemiological programs,  
816 environment, climate change and health. Although we did consider a regional  
817 perspective, the results of this study may not be generalizable to all of the Caribbean.

## Climate services for arboviral diseases in the Caribbean

818 Country-level studies should be conducted to capture the nuances of local governance  
819 structures, disease epidemiology, and climate.

820 Our results were skewed towards the health sector perspective rather than the  
821 climate sector, given that more health sector stakeholders were interviewed, and only  
822 health sector stakeholders were surveyed. In part, this reflected that there were many  
823 more people working in the national health sectors than in the national climate sectors.  
824 On the climate side, our results were skewed towards the regional perspective, given that  
825 regional stakeholders had more experience with climate services for health.

826

### 827 **Conclusion**

828 The results of this study provide recommendations to enhance an interdisciplinary  
829 dialogue and partnership within an active community of practitioners, decision makers,  
830 and scientists [31,80]. This study contributes to a broader effort to work collaboratively  
831 with regional and national health and climate stakeholders in the Caribbean to develop  
832 decision support models to predict arbovirus risk and to design effective warning and  
833 intervention strategies [24].

834 One of the key conclusions of this assessment is the need to strengthen the  
835 provider-user interface, as currently there is only limited consideration of the products  
836 needed by health sector users. Climate services for health can only become operational  
837 with the will and support of the climate and health sector institutions. At the same time,  
838 it is necessary to create appropriate ‘communities of practices’ and to emphasize the co-  
839 design of climate services products [81]. Final recommendations include:

## Climate services for arboviral diseases in the Caribbean

- 840 1. To continue to assess local stakeholder needs and perspectives to support the  
841 development of climate services for health.
- 842 2. To establish a Memorandum of Understanding (MoU) or Letter of Intent (LOI)  
843 between the climate and health sectors, particularly at the national level, with a  
844 focus on the development of climate services [77].
- 845 3. Strengthening the capacity of NMHS through their designation as National  
846 Climate Services Centers (NCSC) [56], allowing them to build capacity around  
847 the basic and operative aspects of climate services and to collaborate with health  
848 sector partners to promote climate services for health.
- 849 4. National Adaptation Plans for Climate Change, including recent regional efforts  
850 to create Health National Adaptation Plans, may be an opportunity to include a  
851 policy or mandate for climate in the health sector, and may be an opportunity to  
852 strengthen climate services, applying long-term scenarios for planning in health  
853 and other sectors.
- 854 5. To strengthen health sector engagement in the region through annual forums  
855 focused on climate services and capacity building tailored to the health sector.  
856 This could build on existing regional climate meetings like the bi-annual  
857 Caribbean Climate Outlook Forum convened by the CIMH.
- 858 6. To implement the WHO operational framework for building climate resilient  
859 health systems [60], and to implement other mechanisms to integrate climate data,  
860 information and knowledge with multiple health and non-health data sources to  
861 support decision making.

## Climate services for arboviral diseases in the Caribbean

862 7. To improve technical GIS and modeling capabilities, and to develop locally  
863 relevant tailored tools for non-experts, which can be used to inform decisions and  
864 decision-making processes.

865

### 866 **Acknowledgements**

867 This study was solicited by the Caribbean Institute for Meteorology and Hydrology  
868 (CIMH) through the United States Agency for International Development's (USAID,  
869 Grant ID: AID-538-10-14-00001) Programme for Building Regional Climate Capacity in  
870 the Caribbean (BRCCC Programme: [rcc.cimh.edu.bb/brccc](http://rcc.cimh.edu.bb/brccc)) with funding made possible  
871 by the generous support of the American people. The authors thank Dr. Shelly-Ann Cox  
872 for her data collection and research support. RL was supported by a Royal Society  
873 Dorothy Hodgkin Fellowship. The funders had no role in study design, data collection  
874 and analysis, decision to publish, or preparation of the manuscript.

875

876 **Competing interests:** The authors have declared that no competing interests exist.

## Climate services for arboviral diseases in the Caribbean

### 877 **Supporting information legends**

878 **S1 Text. Climate and Health Sector Mandates and Competencies.** This document  
879 describes the mandates and competencies of regional (Caribbean) and national (Barbados  
880 and Dominica) climate and health sectors with respect to arbovirus and vector  
881 surveillance and control, and climate monitoring and forecasting. Information was  
882 gathered through face-to-face interviews with key stakeholders.

883 **S2 Text. Interview and survey instruments.** This document contains (1) questions  
884 about climate information for arboviral control, used in interviews with climate and  
885 health decision makers, managers and expert practitioners, (2) interview questions  
886 regarding climate and health data, (3) survey for health sector decision makers, managers,  
887 and expert practitioners.

888 **S3 Text. Forecast scenarios discussed in the Barbados stakeholder workshop.** This  
889 activity was conducted at a national consultation at the PAHO in Bridgetown, Barbados,  
890 in April 2017, with 27 representatives from the national Ministry of Health (MoH) of  
891 Barbados, the Barbados Meteorological Services, the CIMH, and the PAHO. Participants  
892 were divided into small groups that included representatives from climate and health  
893 sectors. Groups were asked to respond to different forecast scenarios (2 week, 3 month,  
894 and 1 year forecasts of *Aedes aegypti* larval indices and dengue incidence). They were  
895 asked to identify the actions that they would take in response to alerts at each time scale,  
896 and they discussed the utility of a vector versus disease forecast. Results were identified  
897 by coding the transcripts of audio recordings.

898 **S4 Table. Types of software currently used in health departments.** Results from  
899 surveys are shown as % (n).

## Climate services for arboviral diseases in the Caribbean

900 **S5 Table. Preferred training activities identified by health sector survey**

901 **respondents.** Results from surveys are shown as % (n).

902 **S6 Table. Current use of climate information and early warning systems reported**

903 **by survey respondents.** Results shown as % (n).

904 **S7 Table. Preferred way of receiving information from an early warning system that**

905 **predicts arbovirus epidemics.** Results shown as % (n).

906



## Climate services for arboviral diseases in the Caribbean

### 907 **References**

- 908 1. Ebi KL, Lewis ND, Corvalan C. Climate variability and change and their potential  
909 health effects in small island states: information for adaptation planning in the  
910 health sector. *Environmental Health Perspectives*. 2006;114: 1957.
- 911 2. PAHO/WHO. Climate change and health in small island developing states: A  
912 WHO special initiative in collaboration with UNFCCC and the Fijian Presidency of  
913 COP-23. SIDS in the Caribbean Region [Internet]. Pan American Health  
914 Organization; 2018. Available:  
915 [https://www.paho.org/hq/index.php?option=com\\_docman&view=download&](https://www.paho.org/hq/index.php?option=com_docman&view=download&category_slug=technical-reports-9862&alias=46262-climate-change-and-health-in-small-island-developing-states-1&Itemid=270&lang=en)  
916 [category\\_slug=technical-reports-9862&alias=46262-climate-change-and-](https://www.paho.org/hq/index.php?option=com_docman&view=download&category_slug=technical-reports-9862&alias=46262-climate-change-and-health-in-small-island-developing-states-1&Itemid=270&lang=en)  
917 [health-in-small-island-developing-states-1&Itemid=270&lang=en](https://www.paho.org/hq/index.php?option=com_docman&view=download&category_slug=technical-reports-9862&alias=46262-climate-change-and-health-in-small-island-developing-states-1&Itemid=270&lang=en)
- 918 3. Briguglio L. Small island developing states and their economic vulnerabilities.  
919 *World Development*. 1995;23: 1615–1632. doi:10.1016/0305-750X(95)00065-  
920 K
- 921 4. Kelman I, West JJ. Articles Climate Change and Small Island Developing States:  
922 A Critical Review.
- 923 5. Caribbean Public Health Agency. State of Public Health in the Caribbean Region  
924 2014 - 2016; Building resilience to immediate and increasing threats: vector-  
925 borne diseases and childhood obesity [Internet]. CARPHA; 2017. Available:  
926 [http://carpha.org/Portals/0/articles/documents/State-of-Public-Health-in-](http://carpha.org/Portals/0/articles/documents/State-of-Public-Health-in-the-Caribbean-2014-2016.pdf)  
927 [the-Caribbean-2014-2016.pdf](http://carpha.org/Portals/0/articles/documents/State-of-Public-Health-in-the-Caribbean-2014-2016.pdf)

## Climate services for arboviral diseases in the Caribbean

- 928 6. Caribbean Public Health Agency. State of Public Health in the Caribbean Region:  
929 Inaugural Report [Internet]. CARPHA; 2013. Available:  
930 [http://carpha.org/downloads/CARPHA-](http://carpha.org/downloads/CARPHA-State_of_Public_Health_Inaugural_Report_2013.pdf)  
931 [State\\_of\\_Public\\_Health\\_Inaugural\\_Report\\_2013.pdf](http://carpha.org/downloads/CARPHA-State_of_Public_Health_Inaugural_Report_2013.pdf)
- 932 7. Caribbean Public Health Agency. CARPHA Urges Region to Prepare for the  
933 Possibility of a Severe Outbreak of Dengue Fever > CARPHA. In: CARPHA  
934 [Internet]. 17 Jan 2019 [cited 24 Jan 2019]. Available:  
935 [http://carpha.org/articles/ID/196/CARPHA-Urges-Region-to-Prepare-for-the-](http://carpha.org/articles/ID/196/CARPHA-Urges-Region-to-Prepare-for-the-Possibility-of-a-Severe-Outbreak-of-Dengue-Fever)  
936 [Possibility-of-a-Severe-Outbreak-of-Dengue-Fever](http://carpha.org/articles/ID/196/CARPHA-Urges-Region-to-Prepare-for-the-Possibility-of-a-Severe-Outbreak-of-Dengue-Fever)
- 937 8. Stanaway JD, Shepard DS, Undurraga EA, Halasa YA, Coffeng LE, Brady OJ, et al.  
938 The global burden of dengue: an analysis from the Global Burden of Disease  
939 Study 2013. *The Lancet Infectious Diseases*. 2016; doi:10.1016/S1473-  
940 3099(16)00026-8
- 941 9. WHO. Dengue: guidelines for diagnosis, treatment, prevention and control.  
942 World Health Organization; 2009.
- 943 10. Mordecai EA, Cohen JM, Evans MV, Gudapati P, Johnson LR, Lippi CA, et al.  
944 Detecting the impact of temperature on transmission of Zika, dengue, and  
945 chikungunya using mechanistic models. *PLoS Neglected Tropical Diseases*.  
946 2017;11: e0005568.

## Climate services for arboviral diseases in the Caribbean

- 947 11. Lowe R, Gasparrini A, Van Meerbeeck CJ, Lippi CA, Mahon R, Trotman AR, et al.  
948 Nonlinear and delayed impacts of climate on dengue risk in Barbados: A  
949 modelling study. *PLoS medicine*. 2018;15: e1002613.
- 950 12. Pontes RJ, Freeman J, Oliveira-Lima JW, Hodgson JC, Spielman A. Vector  
951 densities that potentiate dengue outbreaks in a Brazilian city. *The American*  
952 *Journal of Tropical Medicine and Hygiene*. 2000;62: 378–383.
- 953 13. Amarakoon AMD, Chen AA, Rawlins SC, Taylor MA. Dengue epidemics–its  
954 association with precipitation and temperature, and its seasonality in some  
955 Caribbean countries. *West Indian Med J*. 2004;53: 60.
- 956 14. Depradine CA, Lovell EH. Climatological variables and the incidence of Dengue  
957 fever in Barbados. *International Journal of Environmental Health Research*.  
958 2004;14: 429–441.
- 959 15. Hamilton, I. Analysis of dengue cases in Barbados (2004-2013). Final analysis  
960 report V1.3. 20 March 2014.
- 961 16. Amarakoon D, Chen A, Rawlins S, Chadee DD, Taylor M, Stennett R. Dengue  
962 epidemics in the Caribbean-temperature indices to gauge the potential for  
963 onset of dengue. *Mitig Adapt Strateg Glob Change*. 2008;13: 341–357.  
964 doi:10.1007/s11027-007-9114-5

## Climate services for arboviral diseases in the Caribbean

- 965 17. Ortiz PL, Rivero A, Linares Y, Pérez A, Vázquez JR. Spatial models for prediction  
966 and early warning of *Aedes aegypti* proliferation from data on climate change  
967 and variability in Cuba. *MEDICC review*. 2015;17: 20–28.
- 968 18. Barrera R, Amador M, MacKay AJ. Population Dynamics of *Aedes aegypti* and  
969 Dengue as Influenced by Weather and Human Behavior in San Juan, Puerto  
970 Rico. *PLoS Negl Trop Dis*. 2011;5: e1378. doi:10.1371/journal.pntd.0001378
- 971 19. Chester G. Moore, Barnett L. Cline, Ernest Ruiz-Tiben, Dwayne Lee, Harry  
972 Romney-Joseph, Efrain Rivera-Correa. *Aedes aegypti* in Puerto Rico:  
973 Environmental determinants of larval abundance and relation to dengue virus  
974 transmission. *American Journal of Tropical Medicine and Hygiene*. 1978;27:  
975 1225–1231.
- 976 20. Johansson MA, Dominici F, Glass GE. Local and Global Effects of Climate on  
977 Dengue Transmission in Puerto Rico. *PLoS Negl Trop Dis*. 2009;3: e382.  
978 doi:10.1371/journal.pntd.0000382
- 979 21. Chadee DD, Shivnauth B, Rawlins SC, Chen AA. Climate, mosquito indices and  
980 the epidemiology of dengue fever in Trinidad (2002–2004). *Annals of Tropical  
981 Medicine & Parasitology*. 2007;101: 69–77.
- 982 22. Gharbi M, Quenel P, Gustave J, Cassadou S, Ruche GL, Girdary L, et al. Time  
983 series analysis of dengue incidence in Guadeloupe, French West Indies:  
984 Forecasting models using climate variables as predictors. *BMC Infectious  
985 Diseases*. 2011;11: 166. doi:10.1186/1471-2334-11-166

## Climate services for arboviral diseases in the Caribbean

- 986 23. Chen AA, Chadee DD, Rawlins SC. Climate Change Impact on Dengue: The  
987 Caribbean Experience: University of the West Indies. Phoenix Printery Ltd,  
988 Kingston, Jamaica. 2006;
- 989 24. Trotman AR, Mahon R, Shumake-Guillemot J, Lowe R, Stewart-Ibarra AM.  
990 Strengthening Climate Services for the Health Sector in the Caribbean. Bulletin  
991 of the World Meteorological Organization. 2018;67. Available:  
992 [https://public.wmo.int/en/resources/bulletin/strengthening-climate-](https://public.wmo.int/en/resources/bulletin/strengthening-climate-services-health-sector-caribbean)  
993 [services-health-sector-caribbean](https://public.wmo.int/en/resources/bulletin/strengthening-climate-services-health-sector-caribbean)
- 994 25. Racloz V, Ramsey R, Tong S, Hu W. Surveillance of Dengue Fever Virus: A  
995 Review of Epidemiological Models and Early Warning Systems. PLoS Negl Trop  
996 Dis. 2012;6: e1648. doi:10.1371/journal.pntd.0001648
- 997 26. Ziervogel G, Downing TE. Stakeholder Networks: Improving Seasonal Climate  
998 Forecasts. Climatic Change. 2004;65: 73–101.  
999 doi:10.1023/B:CLIM.0000037492.18679.9e
- 1000 27. Climate Services for Health. In: World Meteorological Organization [Internet]. 9  
1001 Jun 2016 [cited 25 Jan 2019]. Available:  
1002 <https://public.wmo.int/en/media/news/climate-services-health>
- 1003 28. Morss RE, Wilhelmi OV, Downton MW, Grunfest E. Flood risk, uncertainty, and  
1004 scientific information for decision making: lessons from an interdisciplinary  
1005 project. Bulletin of the American Meteorological Society. 2005;86: 1593.

## Climate services for arboviral diseases in the Caribbean

- 1006 29. Soares MB, Alexander M, Dessai S. Sectoral use of climate information in  
1007 Europe: A synoptic overview. *Climate Services*. 2018;9: 5–20.
- 1008 30. Handel AS, Ayala EB, Borbor-Cordova MJ, Fessler AG, Finkelstein JL, Espinoza  
1009 RXR, et al. Knowledge, attitudes, and practices regarding dengue infection  
1010 among public sector healthcare providers in Machala, Ecuador. *Tropical*  
1011 *Diseases, Travel Medicine and Vaccines*. 2016;2: 8. doi:10.1186/s40794-016-  
1012 0024-y
- 1013 31. Health Exemplar to the user interface platform of the Global Framework for  
1014 Climate Services (GFCS) [Internet]. Geneva, Switzerland: World Meteorological  
1015 Association; 2014. Available: [http://www.gfcs-](http://www.gfcs-climate.org/sites/default/files/Priority-Areas/Health/GFCS-HEALTH-EXEMPLAR-FINAL-14152_en.pdf)  
1016 [climate.org/sites/default/files/Priority-Areas/Health/GFCS-HEALTH-](http://www.gfcs-climate.org/sites/default/files/Priority-Areas/Health/GFCS-HEALTH-EXEMPLAR-FINAL-14152_en.pdf)  
1017 [EXEMPLAR-FINAL-14152\\_en.pdf](http://www.gfcs-climate.org/sites/default/files/Priority-Areas/Health/GFCS-HEALTH-EXEMPLAR-FINAL-14152_en.pdf)
- 1018 32. Tompkins AM, Di Giuseppe F. Potential predictability of malaria in Africa using  
1019 ECMWF monthly and seasonal climate forecasts. *Journal of applied*  
1020 *meteorology and climatology*. 2015;54: 521–540.
- 1021 33. Wimberly MC, Henebry GM, Liu Y, Senay GB. EPIDEMIA-An EcoHealth  
1022 Informatics System for integrated forecasting of malaria epidemics. 2014.
- 1023 34. Wang M, Liu Y, Wimberly MC. On the Design of EPIDEMIAWeb–A Cloud Based  
1024 Disease Monitoring System. *IEEE*; 2018. pp. 0574–0577.

## Climate services for arboviral diseases in the Caribbean

- 1025 35. Gould S, Rudolph L. Challenges and Opportunities for Advancing Work on  
1026 Climate Change and Public Health. *International journal of environmental*  
1027 *research and public health*. 2015;12: 15649–15672.
- 1028 36. Maibach EW, Chadwick A, McBride D, Chuk M, Ebi KL, Balbus J. Climate Change  
1029 and Local Public Health in the United States: Preparedness, Programs and  
1030 Perceptions of Local Public Health Department Directors. *PLOS ONE*. 2008;3:  
1031 e2838. doi:10.1371/journal.pone.0002838
- 1032 37. Balbus J, Ebi K, Finzer L, Malina C, Chadwick A, McBride D, et al. Are we ready?  
1033 Preparing for the public health challenges of climate change. *Environmental*  
1034 *Defense Fund*. 2008;
- 1035 38. Are We Ready? Report 2: Preparing for the Public Health Challenges of Climate  
1036 Change. In: US Climate and Health Alliance [Internet]. [cited 16 Mar 2017].  
1037 Available: [http://usclimateandhealthalliance.org/post\\_resource/are-we-ready-](http://usclimateandhealthalliance.org/post_resource/are-we-ready-report-2-preparing-for-the-public-health-challenges-of-climate-change/)  
1038 [report-2-preparing-for-the-public-health-challenges-of-climate-change/](http://usclimateandhealthalliance.org/post_resource/are-we-ready-report-2-preparing-for-the-public-health-challenges-of-climate-change/)
- 1039 39. Paterson JA, Ford JD, Ford LB, Lesnikowski A, Berry P, Henderson J, et al.  
1040 Adaptation to climate change in the Ontario public health sector. *BMC Public*  
1041 *Health*. 2012;12: 452.
- 1042 40. Wei J, Hansen A, Zhang Y, Li H, Liu Q, Sun Y, et al. Perception, attitude and  
1043 behavior in relation to climate change: A survey among CDC health  
1044 professionals in Shanxi province, China. *Environmental research*. 2014;134:  
1045 301–308.

## Climate services for arboviral diseases in the Caribbean

- 1046 41. Macpherson CC, Akpınar-Elci M. Caribbean heat threatens health, well-being  
1047 and the future of humanity. *Public health ethics*. 2015; phv008.
- 1048 42. Assessing the Relationship between Human Health and Climate Variability and  
1049 Change in the Caribbean. St. Lucia: Caribbean Environmental Health Institute  
1050 (CEHI); 2014.
- 1051 43. Heslop-Thoma C, Bailey W, Amarakoon D, Chen A, Rawlins SC, Chadee DD.  
1052 Vulnerability to dengue fever in Jamaica. *Climate change and vulnerability*.  
1053 London: Earthscan Publications Ltd; 2008.
- 1054 44. Ahmed S, Francis L, Ricketts RP, Christian T, Polson-Edwards K, Olowokure B.  
1055 Chikungunya virus outbreak, Dominica, 2014. *Emerging infectious diseases*.  
1056 2015;21: 909.
- 1057 45. Nsoesie EO, Ricketts RP, Brown HE, Fish D, Durham DP, Mbah MLN, et al.  
1058 Spatial and temporal clustering of chikungunya virus transmission in Dominica.  
1059 *PLoS neglected tropical diseases*. 2015;9: e0003977.
- 1060 46. Ryan SJ, Carlson CJ, Stewart-Ibarra AM, Borbor-Cordova MJ, Romero MM, Cox S-  
1061 A, et al. Outbreak of Zika Virus Infections, Dominica, 2016. *Emerging infectious*  
1062 *diseases*. 2017;23: 1926.
- 1063 47. Ryan SJ, Lippi CA, Carlson CJ, Stewart-Ibarra AM, Borbor-Cordova MJ, Romero  
1064 M, et al. Zika Virus Outbreak, Barbados, 2015–2016. *The American journal of*  
1065 *tropical medicine and hygiene*. 2018;98: 1857.



## Climate services for arboviral diseases in the Caribbean

- 1066 48. Kumar A, Gittens-St Hilaire M, Nielsen AL. Long-term epidemiological dynamics  
1067 of dengue in Barbados—one of the English-speaking Caribbean countries.  
1068 *Epidemiology & Infection*. 2018;146: 1048–1055.
- 1069 49. Spence B, Emmanuel K. Climate change implications for water resource  
1070 management in Caribbean tourism. *WW Hospitality Tourism Themes*. 2009;1:  
1071 252–268. doi:10.1108/17554210910980594
- 1072 50. Climate change adaptation to protect human health: Barbados [Internet].  
1073 Public Health and Environment Department (PHE) of the World Health  
1074 Organization; Available:  
1075 [http://www.who.int/globalchange/projects/adaptation/PHE-adaptation-final-](http://www.who.int/globalchange/projects/adaptation/PHE-adaptation-final-Barbados.pdf?ua=1)  
1076 [Barbados.pdf?ua=1](http://www.who.int/globalchange/projects/adaptation/PHE-adaptation-final-Barbados.pdf?ua=1)
- 1077 51. Verret M, Berry P, Fook TCT, Lal A. Assessment of Climate Change and Health  
1078 Vulnerability and Adaptation in Dominica. 2016 p. 144.
- 1079 52. Dominica: The impact of Hurricane Maria - Disaster Profile – January 2018 -  
1080 Dominica. In: ReliefWeb [Internet]. [cited 5 Dec 2018]. Available:  
1081 [https://reliefweb.int/report/dominica/dominica-impact-hurricane-maria-](https://reliefweb.int/report/dominica/dominica-impact-hurricane-maria-disaster-profile-january-2018)  
1082 [disaster-profile-january-2018](https://reliefweb.int/report/dominica/dominica-impact-hurricane-maria-disaster-profile-january-2018)
- 1083 53. Saldana J. An introduction to codes and coding. *The coding manual for*  
1084 *qualitative researchers*. 2009; 1–31.

## Climate services for arboviral diseases in the Caribbean

- 1085 54. Saldaña J. The Coding Manual for Qualitative Researchers. Second Edition  
1086 edition. Los Angeles: SAGE Publications Ltd; 2012.
- 1087 55. Huang C, Vaneckova P, Wang X, FitzGerald G, Guo Y, Tong S. Constraints and  
1088 barriers to public health adaptation to climate change: a review of the  
1089 literature. American journal of preventive medicine. 2011;40: 183–190.
- 1090 56. Mahon R, Greene C, Cox S-A, Guido Z, Gerlak AK, Petrie J-A, et al. Fit for  
1091 purpose? Transforming National Meteorological and Hydrological Services into  
1092 National Climate Service Centers - ScienceDirect. Climate Services.  
1093 doi:<https://doi.org/10.1016/j.cliser.2019.01.002>
- 1094 57. WHO/WMO. Improving public health decision-making in a new climate.  
1095 L.Fernandez-Montoya. JS-G and, editor. 2016.
- 1096 58. World Meteorological Organization 2014. Health Exemplar to the User  
1097 Interface Platform of the Global Framework for Climate Services. Geneva:  
1098 World Meteorological Organization; 2014.
- 1099 59. World Health Organization. Climate-resilient water safety plans: Managing  
1100 health risks associated with climate variability and change [Internet]. WHO;  
1101 2017. Available:  
1102 [https://www.who.int/water\\_sanitation\\_health/publications/climate-resilient-](https://www.who.int/water_sanitation_health/publications/climate-resilient-water-safety-plans/en/)  
1103 [water-safety-plans/en/](https://www.who.int/water_sanitation_health/publications/climate-resilient-water-safety-plans/en/)

## Climate services for arboviral diseases in the Caribbean

- 1104 60. World Health Organization. Operational framework for building climate  
1105 resilient health systems [Internet]. WHO; 2015. Available:  
1106 [https://www.who.int/globalchange/publications/building-climate-resilient-](https://www.who.int/globalchange/publications/building-climate-resilient-health-systems/en/)  
1107 [health-systems/en/](https://www.who.int/globalchange/publications/building-climate-resilient-health-systems/en/)
- 1108 61. PAHO/WHO. Caribbean Ministers of Health meet to approve plan on health  
1109 system resilience in the face of climate change [Internet]. 16 Oct 2018 [cited 6  
1110 Mar 2019]. Available:  
1111 [https://www.paho.org/hq/index.php?option=com\\_content&view=article&id=1](https://www.paho.org/hq/index.php?option=com_content&view=article&id=14736:caribbean-ministers-of-health-meet-to-approve-plan-on-health-system-resilience-in-the-face-of-climate-change&Itemid=1926&lang=en)  
1112 [4736:caribbean-ministers-of-health-meet-to-approve-plan-on-health-system-](https://www.paho.org/hq/index.php?option=com_content&view=article&id=14736:caribbean-ministers-of-health-meet-to-approve-plan-on-health-system-resilience-in-the-face-of-climate-change&Itemid=1926&lang=en)  
1113 [resilience-in-the-face-of-climate-change&Itemid=1926&lang=en](https://www.paho.org/hq/index.php?option=com_content&view=article&id=14736:caribbean-ministers-of-health-meet-to-approve-plan-on-health-system-resilience-in-the-face-of-climate-change&Itemid=1926&lang=en)
- 1114 62. Lowe R, Bailey TC, Stephenson DB, Graham RJ, Coelho CAS, Sá Carvalho M, et al.  
1115 Spatio-temporal modelling of climate-sensitive disease risk: Towards an early  
1116 warning system for dengue in Brazil. *Computers & Geosciences*. 2011;37: 371–  
1117 381. doi:10.1016/j.cageo.2010.01.008
- 1118 63. Lowe R, Bailey TC, Stephenson DB, Jupp TE, Graham RJ, Barcellos C, et al. The  
1119 development of an early warning system for climate-sensitive disease risk with  
1120 a focus on dengue epidemics in Southeast Brazil. *Statistics in medicine*.  
1121 2013;32: 864–883.
- 1122 64. Lowe R, Barcellos C, Coelho CA, Bailey TC, Coelho GE, Graham R, et al. Dengue  
1123 outlook for the World Cup in Brazil: an early warning model framework driven

## Climate services for arboviral diseases in the Caribbean

- 1124 by real-time seasonal climate forecasts. *The Lancet Infectious Diseases*.  
1125 2014;14: 619–626.
- 1126 65. Lowe R, Coelho CA, Barcellos C, Carvalho MS, Catao RDC, Coelho GE, et al.  
1127 Evaluating probabilistic dengue risk forecasts from a prototype early warning  
1128 system for Brazil. *Elife*. 2016;5: e11285.
- 1129 66. Lowe R, Stewart-Ibarra AM, Petrova D, García-Díez M, Borbor-Cordova MJ,  
1130 Mejía R, et al. Climate services for health: predicting the evolution of the 2016  
1131 dengue season in Machala, Ecuador. *The Lancet Planetary Health*. 2017;1:  
1132 e142–e151. doi:10.1016/S2542-5196(17)30064-5
- 1133 67. Schreiber KV. An investigation of relationships between climate and dengue  
1134 using a water budgeting technique. *International Journal of Biometeorology*.  
1135 2001;45: 81–89. doi:10.1007/s004840100090
- 1136 68. Yu H-L, Yang S-J, Yen H-J, Christakos G. A spatio-temporal climate-based model  
1137 of early dengue fever warning in southern Taiwan. *Stochastic Environmental  
1138 Research and Risk Assessment*. 2011;25: 485–494. doi:10.1007/s00477-010-  
1139 0417-9
- 1140 69. Gasparrini A. Modeling exposure–lag–response associations with distributed  
1141 lag non-linear models. *Statistics in medicine*. 2014;33: 881–899.
- 1142 70. Agreement P. United nations framework convention on climate change. Paris,  
1143 France. 2015;

## Climate services for arboviral diseases in the Caribbean

- 1144 71. Nations U. Transforming our world: The 2030 agenda for sustainable  
1145 development. Resolution adopted by the General Assembly. 2015;
- 1146 72. Segger M-CC. Advancing the Paris Agreement on Climate Change for  
1147 Sustainable Development. *Cambridge J Int'l & Comp L*. 2016;5: 202.
- 1148 73. Nilsson M, Griggs D, Visbeck M. Policy: Map the interactions between  
1149 Sustainable Development Goals. *Nature News*. 2016;534: 320.  
1150 doi:10.1038/534320a
- 1151 74. Green Climate Fund. Project FP060: Water Sector Resilience Nexus for  
1152 Sustainability in Barbados (WSRN S-Barbados) [Internet]. [cited 6 Mar 2019].  
1153 Available:  
1154 [https://www.greenclimate.fund/projects/fp060?inheritRedirect=true&redirect=%2Fwhat-we-do%2Fprojects-programmes%3Fp\\_p\\_id%3D101\\_INSTANCE\\_Hreg2cAkDEHL%26p\\_p\\_lifecycle%3D0%26p\\_p\\_state%3Dnormal%26p\\_p\\_mode%3Dview%26p\\_p\\_col\\_id%3D18\\_INSTANCE\\_4ZRnUzRWpEqO\\_column-2%26p\\_p\\_col\\_pos%3D1%26p\\_p\\_col\\_count%3D2%26\\_101\\_INSTANCE\\_Hreg2cAkDEHL\\_delta%3D30%26\\_101\\_INSTANCE\\_Hreg2cAkDEHL\\_keywords%3D%26\\_101\\_INSTANCE\\_Hreg2cAkDEHL\\_advancedSearch%3Dfalse%26\\_101\\_INSTANCE\\_Hreg2cAkDEHL\\_andOperator%3Dtrue%26p\\_r\\_p\\_564233524\\_resetCur%3Dfalse%26\\_101\\_INSTANCE\\_Hreg2cAkDEHL\\_cur%3D2](https://www.greenclimate.fund/projects/fp060?inheritRedirect=true&redirect=%2Fwhat-we-do%2Fprojects-programmes%3Fp_p_id%3D101_INSTANCE_Hreg2cAkDEHL%26p_p_lifecycle%3D0%26p_p_state%3Dnormal%26p_p_mode%3Dview%26p_p_col_id%3D18_INSTANCE_4ZRnUzRWpEqO_column-2%26p_p_col_pos%3D1%26p_p_col_count%3D2%26_101_INSTANCE_Hreg2cAkDEHL_delta%3D30%26_101_INSTANCE_Hreg2cAkDEHL_keywords%3D%26_101_INSTANCE_Hreg2cAkDEHL_advancedSearch%3Dfalse%26_101_INSTANCE_Hreg2cAkDEHL_andOperator%3Dtrue%26p_r_p_564233524_resetCur%3Dfalse%26_101_INSTANCE_Hreg2cAkDEHL_cur%3D2)  
1155  
1156  
1157  
1158  
1159  
1160  
1161  
1162  
1163

## Climate services for arboviral diseases in the Caribbean

- 1164 75. McNie E. Delivering Climate Services: Organizational Strategies and  
1165 Approaches for Producing Useful Climate-Science Information. Weather,  
1166 Climate, and Society. 2012;
- 1167 76. Miles EL, Snover AK, Binder LCW, Sarachik ES, Mote PW, Mantua N. An  
1168 approach to designing a national climate service. 2006;
- 1169 77. CIMH, CARDI, CDEMA, CARHA, CTO, CHTA, et al. Consortium of Regional  
1170 Sectoral Early Warning Information across Climate Timescales (EWISACTs)  
1171 Coordination Partners' Terms of Reference [Internet]. Bridgetown, Barbados;  
1172 2016 Aug. Available: [https://rcc.cimh.edu.bb/files/2016/10/TOR-Sectoral-](https://rcc.cimh.edu.bb/files/2016/10/TOR-Sectoral-EWISACTs-Consortium-and-5-Sectoral-Partners.pdf)  
1173 [EWISACTs-Consortium-and-5-Sectoral-Partners.pdf](https://rcc.cimh.edu.bb/files/2016/10/TOR-Sectoral-EWISACTs-Consortium-and-5-Sectoral-Partners.pdf)
- 1174 78. A Caribbean strategy to cope with climate change | United Nations Educational,  
1175 Scientific and Cultural Organization [Internet]. [cited 31 Jan 2019]. Available:  
1176 [http://www.unesco.org/new/en/media-services/single-](http://www.unesco.org/new/en/media-services/single-view/news/a_caribbean_strategy_to_cope_with_climate_change/)  
1177 [view/news/a\\_caribbean\\_strategy\\_to\\_cope\\_with\\_climate\\_change/](http://www.unesco.org/new/en/media-services/single-view/news/a_caribbean_strategy_to_cope_with_climate_change/)
- 1178 79. Mahon R, Farrell D, Cox S-A, Trotman A, Van Meerbeeck CJ, Barnwell G. Climate  
1179 Services and Caribbean Resilience: A Historical Perspective. Social and  
1180 Economic Studies Journal The University of the West Indies at Mona, Jamaica.  
1181 2018;67: 239–260.
- 1182 80. Implementation Plan of the Global Framework for Climate Services [Internet].  
1183 World Meteorological Association; 2014. Available:

## Climate services for arboviral diseases in the Caribbean

- 1184 <http://www.wmo.int/gfcs/sites/default/files/implementation-plan//GFCS->  
1185 [IMPLEMENTATION-PLAN-FINAL-14211\\_en.pdf](http://www.wmo.int/gfcs/sites/default/files/implementation-plan//GFCS-IMPLEMENTATION-PLAN-FINAL-14211_en.pdf)
- 1186 81. Street R, Jacob D, Parry M, Runge T, Scott J. A European research and  
1187 innovation roadmap for climate services. European Commission. 2015;
- 1188 82. PAHO WHO | Dengue | Annual Cases Reported of Dengue | PAHO/WHO Data,  
1189 Maps and Statistics [Internet]. [cited 18 Jul 2017]. Available:  
1190 [http://www.paho.org/hq/index.php?option=com\\_topics&view=rdmore&cid=6](http://www.paho.org/hq/index.php?option=com_topics&view=rdmore&cid=6)  
1191 [290&Itemid=40734](http://www.paho.org/hq/index.php?option=com_topics&view=rdmore&cid=6290&Itemid=40734)
- 1192 83. PAHO. Number of Reported Cases of Chikungunya Fever in the Americas, by  
1193 Country or Territory. [Internet]. Available:  
1194 [http://www.paho.org/hq/index.php?option=com\\_topics&view=readall&cid=5](http://www.paho.org/hq/index.php?option=com_topics&view=readall&cid=5)  
1195 [927&Itemid=40931&lang=en](http://www.paho.org/hq/index.php?option=com_topics&view=readall&cid=5927&Itemid=40931&lang=en)
- 1196
